# Supplementary material for: Molecular tracking devices quantify antigen distribution and archiving in the murine lymph node
Source: eLife. 2021 Apr 12;10:e62781. doi: 10.7554/eLife.62781 (PMC8116055; doi:10.7554/eLife.62781)
Supplement: Figure 5—source data 1. — Ova-low and ova-high cells were identified independently for DCs, FRCs, and LECs using a Gaussian mixture model implemented with the R package mixtools. Differentially expressed genes were identified as described for Figure 4—source data 1. [file elife-62781-fig5-data1.xlsx]

## Sheet: Myeloid_Day_2
Sample	gene	group	avgExpr	logFC	statistic	auc	pval	padj	pct_in	pct_out
Myeloid Cells (Day 2)	Psap	ova high	2.64238	0.858216	8.45142e+06	0.696022	6.37769e-168	7.7117e-165	92.0307	76.3844
Myeloid Cells (Day 2)	Dusp1	ova high	2.54462	0.790112	8733539	0.719256	6.34125e-209	3.06705e-205	94.7006	80.7003
Myeloid Cells (Day 2)	Fth1	ova high	4.14607	0.743607	7857040	0.647071	8.19141e-95	1.02463e-92	98.5841	97.7809
Myeloid Cells (Day 2)	Ctsb	ova high	1.63587	0.702616	8216166	0.676647	2.6792e-143	1.14339e-140	76.335	55.7003
Myeloid Cells (Day 2)	Il1rn	ova high	1.5524	0.70055	7.8872e+06	0.649555	1.23391e-110	2.63294e-108	65.6149	43.8925
Myeloid Cells (Day 2)	Clec4a1	ova high	1.22705	0.694924	8.14282e+06	0.670607	2.15089e-162	1.95059e-159	58.6974	29.8656
Myeloid Cells (Day 2)	Lgmn	ova high	1.19276	0.687665	8383955	0.690466	3.41092e-190	8.24875e-187	66.8689	32.9397
Myeloid Cells (Day 2)	Fpr2	ova high	1.10233	0.679811	8098440	0.666952	6.06487e-172	8.80012e-169	54.0453	22.9235
Myeloid Cells (Day 2)	Cstb	ova high	2.14833	0.669327	8.40845e+06	0.692483	2.43477e-162	2.07815e-159	89.0372	74.9593
Myeloid Cells (Day 2)	Cebpb	ova high	1.59814	0.665156	7.69184e+06	0.633466	5.01777e-90	5.7329e-88	62.5809	42.3453
Myeloid Cells (Day 2)	Grn	ova high	1.49117	0.658065	8214926	0.676545	7.47742e-147	3.39054e-144	72.3706	50.0611
Myeloid Cells (Day 2)	Sod2	ova high	1.4534	0.638082	7826335	0.644543	5.09694e-105	8.80435e-103	64.3608	41.8363
Myeloid Cells (Day 2)	Ptgs2	ova high	1.24611	0.632688	7778733	0.640622	4.50658e-111	9.75978e-109	56.1084	31.0668
Myeloid Cells (Day 2)	Tgfbi	ova high	1.14363	0.620892	7.83977e+06	0.645649	3.24544e-122	9.61047e-120	53.9644	29.3974
Myeloid Cells (Day 2)	Zeb2	ova high	1.68601	0.619795	7913867	0.651751	1.85861e-107	3.59579e-105	73.665	53.4609
Myeloid Cells (Day 2)	Ms4a6d	ova high	1.33438	0.603493	7.76288e+06	0.639317	3.59016e-103	5.72453e-101	60.4773	35.5252
Myeloid Cells (Day 2)	Ctsd	ova high	0.953224	0.600758	8158322	0.671884	5.82977e-177	1.20843e-173	55.3803	24.6539
Myeloid Cells (Day 2)	Ccl4	ova high	1.43027	0.591721	7430263	0.611924	3.74357e-68	2.17277e-66	55.5421	36.2785
Myeloid Cells (Day 2)	BC005537	ova high	1.70309	0.581683	8.42556e+06	0.693892	7.78907e-166	8.6938e-163	88.2282	68.6075
Myeloid Cells (Day 2)	Pgk1	ova high	1.16084	0.573207	8184394	0.674031	2.11377e-151	1.09538e-148	68.3657	39.7598
Myeloid Cells (Day 2)	Nampt	ova high	1.66782	0.569928	8199869	0.675305	4.95912e-137	1.94478e-134	84.5065	64.8616
Myeloid Cells (Day 2)	Sirpa	ova high	1.01644	0.566632	8142848	0.670609	7.39383e-160	5.64655e-157	60.1942	30.8632
Myeloid Cells (Day 2)	Grina	ova high	1.0665	0.556652	8021649	0.660628	5.25472e-137	2.00647e-134	61.6909	34.4259
Myeloid Cells (Day 2)	Clec4a3	ova high	1.18703	0.556514	7.69848e+06	0.634013	2.8461e-100	4.1714e-98	56.6343	31.6572
Myeloid Cells (Day 2)	Il1b	ova high	1.53018	0.553877	7.46893e+06	0.615108	3.53359e-67	1.9873e-65	63.3495	42.6507
Myeloid Cells (Day 2)	Marcks	ova high	2.56727	0.548064	7579863	0.624244	1.92471e-68	1.13527e-66	93.4466	80.3339
Myeloid Cells (Day 2)	Ccr5	ova high	1.01948	0.531694	7.8097e+06	0.643173	1.12655e-118	2.97204e-116	54.4094	28.7459
Myeloid Cells (Day 2)	Vim	ova high	2.28688	0.519805	7.80953e+06	0.643159	2.24409e-90	2.64729e-88	90.4126	79.1735
Myeloid Cells (Day 2)	Cybb	ova high	1.47882	0.506411	7.39018e+06	0.608622	7.37817e-60	3.24416e-58	60.6392	44.5033
Myeloid Cells (Day 2)	Gbp4	ova high	1.27761	0.502071	7.91811e+06	0.6521	7.05982e-110	1.48461e-107	73.3414	48.7174
Myeloid Cells (Day 2)	Ly6c2	ova high	2.0797	0.497239	6.92052e+06	0.569944	4.27754e-25	4.19089e-24	61.8528	49.7557
Myeloid Cells (Day 2)	Ms4a6c	ova high	1.79918	0.495851	7.30455e+06	0.601571	2.90843e-50	9.31597e-49	64.6036	51.934
Myeloid Cells (Day 2)	Cd274	ova high	2.05611	0.495152	7.92499e+06	0.652667	1.39559e-102	2.15426e-100	90.3317	78.1148
Myeloid Cells (Day 2)	Pla2g7	ova high	0.927918	0.494162	7750336	0.638284	1.64669e-116	4.04974e-114	52.0227	25.4072
Myeloid Cells (Day 2)	Pkm	ova high	1.47025	0.479758	7723203	0.636049	7.96918e-86	8.25949e-84	73.5032	57.0033
Myeloid Cells (Day 2)	Eif4g2	ova high	1.46403	0.471747	8038909	0.662049	9.49149e-118	2.45931e-115	83.3333	63.6197
Myeloid Cells (Day 2)	Gbp2	ova high	1.86088	0.467226	7678833	0.632395	2.56003e-78	2.13483e-76	84.0615	71.193
Myeloid Cells (Day 2)	Sdc3	ova high	1.03329	0.465264	7.9648e+06	0.655946	1.07911e-121	3.13157e-119	67.1926	40.737
Myeloid Cells (Day 2)	Fcer1g	ova high	2.5301	0.464096	7.21068e+06	0.59384	4.08485e-40	8.50375e-39	81.3916	75.4682
Myeloid Cells (Day 2)	Mif	ova high	1.5738	0.463768	7.44537e+06	0.613168	2.26018e-60	1.01533e-58	70.5097	56.2093
Myeloid Cells (Day 2)	Blvrb	ova high	0.913761	0.46269	7689736	0.633293	8.66259e-102	1.3231e-99	53.7621	30.3746
Myeloid Cells (Day 2)	Atp2b1	ova high	1.64536	0.454584	7.65975e+06	0.630823	6.38926e-77	5.122e-75	85.8414	66.2866
Myeloid Cells (Day 2)	Rnf149	ova high	1.16784	0.454307	7594672	0.625464	2.54062e-79	2.20745e-77	62.1764	43.5464
Myeloid Cells (Day 2)	Capg	ova high	0.881822	0.450178	7.81164e+06	0.643332	5.21123e-119	1.40028e-116	56.2298	27.7687
Myeloid Cells (Day 2)	C3	ova high	0.915646	0.448918	7.63652e+06	0.628911	1.90872e-99	2.68888e-97	52.4272	26.9951
Myeloid Cells (Day 2)	Canx	ova high	1.06067	0.446761	7.99784e+06	0.658667	2.68153e-121	7.62922e-119	72.411	45.4397
Myeloid Cells (Day 2)	Lilr4b	ova high	0.891044	0.444934	7698672	0.634029	5.00427e-104	8.25136e-102	54.1667	29.0717
Myeloid Cells (Day 2)	Ccl5	ova high	3.99554	0.444697	6.51735e+06	0.53674	2.42517e-07	6.80249e-07	96.966	86.3803
Myeloid Cells (Day 2)	Ly6i	ova high	1.59809	0.444167	7062241	0.581615	2.25258e-34	3.57213e-33	59.6278	46.0098
Myeloid Cells (Day 2)	Plin2	ova high	0.738516	0.443439	7848066	0.646332	6.49738e-135	2.41736e-132	50.6068	23.2695
Myeloid Cells (Day 2)	Tnfaip2	ova high	1.24381	0.435925	7438181	0.612576	3.22621e-64	1.66592e-62	62.7427	43.2818
Myeloid Cells (Day 2)	Tnfaip3	ova high	1.30459	0.433615	7.67663e+06	0.632213	1.5044e-81	1.38158e-79	75.6877	54.2956
Myeloid Cells (Day 2)	Aldoa	ova high	1.56712	0.432627	7.61691e+06	0.627295	1.02105e-73	7.52055e-72	79.3285	63.2736
Myeloid Cells (Day 2)	Mcl1	ova high	2.08921	0.431766	7.9544e+06	0.65509	1.92649e-105	3.40894e-103	92.6375	84.202
Myeloid Cells (Day 2)	Rsad2	ova high	1.01195	0.427629	7486367	0.616544	7.18725e-74	5.32077e-72	56.432	35.6067
Myeloid Cells (Day 2)	Prdx1	ova high	2.08716	0.42509	7189554	0.5921	1.42759e-38	2.70775e-37	84.4256	77.9112
Myeloid Cells (Day 2)	Atp6v1b2	ova high	0.963872	0.42184	7874809	0.648535	2.7977e-111	6.24532e-109	66.9903	39.7598
Myeloid Cells (Day 2)	Sdcbp	ova high	1.38829	0.421001	7565852	0.62309	7.9132e-71	5.08056e-69	71.8042	56.7386
Myeloid Cells (Day 2)	Tpi1	ova high	1.07487	0.420473	7584453	0.624622	1.39618e-79	1.22779e-77	62.5809	40.5537
Myeloid Cells (Day 2)	Ehd1	ova high	0.840885	0.4182	7.93981e+06	0.653888	5.98159e-128	1.97257e-125	62.2977	32.0847
Myeloid Cells (Day 2)	Zfp36	ova high	2.34644	0.413716	7667074	0.631427	3.34818e-76	2.62606e-74	93.8916	86.1971
Myeloid Cells (Day 2)	Rnf19b	ova high	1.4836	0.412922	7639085	0.629121	2.87692e-75	2.17417e-73	83.5761	64.9837
Myeloid Cells (Day 2)	AA467197	ova high	1.16112	0.411639	7432920	0.612143	4.85214e-65	2.56016e-63	63.2686	39.5969
Myeloid Cells (Day 2)	Cd44	ova high	0.999875	0.409028	7654541	0.630394	4.95022e-88	5.44149e-86	62.9854	38.3958
Myeloid Cells (Day 2)	Pgam1	ova high	0.943893	0.406203	7642979	0.629442	2.17298e-88	2.40687e-86	59.3042	37.5611
Myeloid Cells (Day 2)	Rbms1	ova high	1.2201	0.402979	7.69074e+06	0.633376	2.82857e-83	2.70016e-81	73.7055	54.0717
Myeloid Cells (Day 2)	Fcgr2b	ova high	0.799136	0.398469	7.61603e+06	0.627223	4.91285e-99	6.85437e-97	50.5663	26.0383
Myeloid Cells (Day 2)	Id2	ova high	2.12536	0.398138	7.08232e+06	0.583268	5.78673e-32	8.36309e-31	87.055	72.1498
Myeloid Cells (Day 2)	Ier3	ova high	0.881173	0.395953	7512603	0.618705	6.27261e-82	5.79717e-80	52.589	29.9674
Myeloid Cells (Day 2)	Tnfrsf1b	ova high	0.838558	0.393548	7.71317e+06	0.635223	3.53008e-100	5.12215e-98	59.2233	32.4919
Myeloid Cells (Day 2)	Ctsc	ova high	1.51542	0.392883	7.23303e+06	0.595681	8.9471e-44	2.17458e-42	69.5388	55.9039
Myeloid Cells (Day 2)	S100a10	ova high	1.03649	0.392515	7533942	0.620462	6.09245e-76	4.72735e-74	62.9045	37.3779
Myeloid Cells (Day 2)	Gm42418	ova high	3.00638	0.390137	7220314	0.594633	2.54311e-40	5.3479e-39	98.1796	95.7248
Myeloid Cells (Day 2)	Lyz2	ova high	1.84832	0.387407	6.82493e+06	0.562071	6.71723e-21	5.04749e-20	60.4369	42.671
Myeloid Cells (Day 2)	Dazap2	ova high	1.66894	0.386461	7774359	0.640262	4.6155e-87	4.92433e-85	88.754	76.0179
Myeloid Cells (Day 2)	Fgl2	ova high	1.34118	0.383062	7289200	0.600306	4.82129e-49	1.44838e-47	66.8285	50.9161
Myeloid Cells (Day 2)	Atf4	ova high	1.30726	0.379204	7.59632e+06	0.6256	4.08847e-72	2.75924e-70	80.2994	60.7695
Myeloid Cells (Day 2)	Gnb1	ova high	1.57215	0.379173	7.72955e+06	0.636571	6.31236e-83	5.94756e-81	87.0146	72.9235
Myeloid Cells (Day 2)	Tcirg1	ova high	0.729421	0.378751	7711395	0.635077	5.37381e-109	1.11391e-106	52.4272	26.9951
Myeloid Cells (Day 2)	App	ova high	1.05756	0.377705	7.60996e+06	0.626723	1.80819e-78	1.53432e-76	67.8803	46.6002
Myeloid Cells (Day 2)	Serp1	ova high	1.13527	0.375114	7473286	0.615467	2.63356e-64	1.36475e-62	67.8398	50.7736
Myeloid Cells (Day 2)	Nrp2	ova high	0.764681	0.369938	7710711	0.63502	3.8778e-106	7.03337e-104	55.7443	27.728
Myeloid Cells (Day 2)	Pabpc1	ova high	1.69952	0.369862	7.57034e+06	0.62346	6.26875e-68	3.62388e-66	89.1181	74.8371
Myeloid Cells (Day 2)	Capza2	ova high	1.74225	0.369829	7537447	0.620751	3.57077e-65	1.89787e-63	86.246	74.2875
Myeloid Cells (Day 2)	Gna13	ova high	1.09608	0.367074	7583189	0.624518	2.89816e-74	2.16764e-72	70.0647	50.3868
Myeloid Cells (Day 2)	Lmo4	ova high	0.959864	0.366333	7492715	0.617067	3.91469e-71	2.54718e-69	61.0032	39.8005
Myeloid Cells (Day 2)	Tapbp	ova high	1.76324	0.364563	7.6597e+06	0.630819	8.04462e-76	6.20891e-74	89.1586	78.8681
Myeloid Cells (Day 2)	Fbxl5	ova high	0.744404	0.363447	7515183	0.618917	2.9927e-84	2.97425e-82	51.2945	28.2777
Myeloid Cells (Day 2)	Klra2	ova high	0.851641	0.363417	7426010	0.611574	2.18103e-73	1.58234e-71	51.8204	29.2956
Myeloid Cells (Day 2)	Vmp1	ova high	0.755314	0.362801	7671179	0.631765	5.06298e-99	6.99655e-97	55.2589	30.1303
Myeloid Cells (Day 2)	Wfdc17	ova high	0.994564	0.361152	7239220	0.59619	3.50143e-53	1.25137e-51	52.0631	32.6547
Myeloid Cells (Day 2)	Hif1a	ova high	1.20732	0.359902	7365678	0.606605	2.16054e-54	8.1427e-53	68.6489	53.7256
Myeloid Cells (Day 2)	Gsr	ova high	0.744834	0.359147	7577199	0.624025	3.25398e-91	3.90209e-89	51.7395	28.3184
Myeloid Cells (Day 2)	Csrnp1	ova high	0.970134	0.358669	7496003	0.617338	2.52664e-69	1.52756e-67	64.199	43.2818
Myeloid Cells (Day 2)	Lst1	ova high	1.71438	0.35737	6.87509e+06	0.566202	5.11543e-22	4.1259e-21	66.0194	54.9674
Myeloid Cells (Day 2)	Cflar	ova high	1.46135	0.35254	7.40364e+06	0.609732	9.22972e-55	3.50584e-53	83.9806	66.022
Myeloid Cells (Day 2)	N4bp1	ova high	0.896858	0.351588	7558901	0.622518	1.68105e-77	1.37034e-75	62.1764	39.6783
Myeloid Cells (Day 2)	Cfb	ova high	0.837031	0.348563	7363051	0.606389	1.25164e-67	7.15013e-66	50.3641	28.9902
Myeloid Cells (Day 2)	Ccdc71l	ova high	0.648182	0.347756	7735762	0.637083	6.21171e-117	1.554e-114	51.6586	23.8803
Myeloid Cells (Day 2)	Klf6	ova high	2.49745	0.347022	7321078	0.602932	2.10685e-47	5.90161e-46	95.9951	90.0651
Myeloid Cells (Day 2)	Cd53	ova high	1.10469	0.345284	7.22429e+06	0.59496	1.88604e-46	5.11523e-45	59.021	44.2386
Myeloid Cells (Day 2)	Irgm1	ova high	1.13463	0.34522	7433085	0.612156	1.98432e-60	8.94178e-59	69.2961	51.5065
Myeloid Cells (Day 2)	Eef2	ova high	1.43308	0.34467	7.44759e+06	0.613351	2.62951e-58	1.10592e-56	83.2524	66.4495
Myeloid Cells (Day 2)	Basp1	ova high	1.98364	0.343151	6.91906e+06	0.569823	5.60541e-23	4.78232e-22	87.9854	71.0505
Myeloid Cells (Day 2)	Man2a1	ova high	0.823243	0.34214	7457924	0.614202	2.94072e-73	2.12288e-71	54.4903	32.8583
Myeloid Cells (Day 2)	Creg1	ova high	0.769937	0.339968	7434230	0.612251	8.18428e-71	5.23145e-69	53.8835	33.2044
Myeloid Cells (Day 2)	Lgals3	ova high	1.55667	0.339734	7019015	0.578055	2.33965e-29	2.9469e-28	70.7524	59.3241
Myeloid Cells (Day 2)	Lcp1	ova high	2.00917	0.339515	7.27873e+06	0.599444	1.28843e-44	3.21222e-43	88.1472	78.013
Myeloid Cells (Day 2)	Fos	ova high	2.15845	0.336634	7.02167e+06	0.578274	1.77589e-28	2.10009e-27	80.7443	74.0228
Myeloid Cells (Day 2)	Lamp2	ova high	1.03632	0.336279	7.41514e+06	0.610678	1.93988e-60	8.79613e-59	65.6958	47.1906
Myeloid Cells (Day 2)	Junb	ova high	2.72918	0.336165	7.47588e+06	0.615681	2.22362e-59	9.63128e-58	96.7638	93.75
Myeloid Cells (Day 2)	Hnrnph1	ova high	1.04928	0.333943	7.48095e+06	0.616098	8.49586e-65	4.45036e-63	70.9547	49.9593
Myeloid Cells (Day 2)	Plekho2	ova high	0.803103	0.330347	7.46567e+06	0.61484	1.50226e-72	1.0282e-70	55.7848	34.6091
Myeloid Cells (Day 2)	Rap1b	ova high	1.68034	0.329742	7.49082e+06	0.616911	4.4636e-61	2.08253e-59	86.9337	76.4862
Myeloid Cells (Day 2)	Wsb1	ova high	0.852328	0.329742	7480824	0.616088	6.05731e-71	3.90629e-69	60.0324	38.2329
Myeloid Cells (Day 2)	Actr3	ova high	1.93077	0.326287	7466234	0.614886	9.23487e-59	3.94112e-57	91.8285	82.1458
Myeloid Cells (Day 2)	Prdx5	ova high	1.61529	0.325597	6848071	0.563977	7.25217e-21	5.43258e-20	64.8463	52.8705
Myeloid Cells (Day 2)	Ubc	ova high	2.2663	0.323597	7615785	0.627203	1.94714e-71	1.29009e-69	95.4288	90.3298
Myeloid Cells (Day 2)	Rapgef2	ova high	0.797993	0.322774	7490481	0.616883	1.9096e-74	1.43567e-72	58.0906	34.5073
Myeloid Cells (Day 2)	Dstn	ova high	1.00544	0.318538	7.28088e+06	0.599622	3.79551e-49	1.14975e-47	66.788	47.3534
Myeloid Cells (Day 2)	Syk	ova high	0.807601	0.318376	7487080	0.616603	7.10336e-73	4.93156e-71	58.8997	36.2581
Myeloid Cells (Day 2)	Itm2c	ova high	0.965623	0.31704	7.35494e+06	0.60572	1.46301e-55	5.69122e-54	66.7476	45.684
Myeloid Cells (Day 2)	Ms4a6b	ova high	1.26718	0.314895	6978476	0.574717	4.61672e-29	5.68664e-28	59.8706	46.0098
Myeloid Cells (Day 2)	Mpeg1	ova high	1.06212	0.313067	7.20964e+06	0.593754	6.93308e-45	1.75565e-43	61.6909	44.6458
Myeloid Cells (Day 2)	Efhd2	ova high	1.76094	0.311454	7346270	0.605007	1.3881e-49	4.28539e-48	87.1764	77.3412
Myeloid Cells (Day 2)	Pfkfb3	ova high	1.14168	0.310059	7197472	0.592752	2.86422e-42	6.4534e-41	69.7006	49.0024
Myeloid Cells (Day 2)	Ptbp3	ova high	1.2395	0.309717	7.36973e+06	0.606939	8.2737e-53	2.92808e-51	78.1958	61.5839
Myeloid Cells (Day 2)	Rnf115	ova high	1.05634	0.307378	7289623	0.600341	8.91885e-49	2.64647e-47	71.4806	50.1425
Myeloid Cells (Day 2)	Glipr2	ova high	1.32783	0.306446	7.00321e+06	0.576753	2.94222e-29	3.67714e-28	66.8285	52.4226
Myeloid Cells (Day 2)	Snx10	ova high	0.940798	0.306302	7377609	0.607587	9.67112e-58	3.99795e-56	65.7767	45.2362
Myeloid Cells (Day 2)	Hnrnpf	ova high	1.41699	0.305226	7.33991e+06	0.604483	1.28166e-49	3.99074e-48	82.767	69.3811
Myeloid Cells (Day 2)	Pirb	ova high	1.28751	0.304834	7215238	0.594215	5.01044e-42	1.12021e-40	70.8333	58.9984
Myeloid Cells (Day 2)	Atp1b3	ova high	0.773068	0.303139	7.3622e+06	0.606318	8.11142e-63	4.05851e-61	54.7735	34.4055
Myeloid Cells (Day 2)	Abcg1	ova high	0.796765	0.30239	7.46454e+06	0.614747	3.35877e-70	2.10977e-68	61.1246	35.9731
Myeloid Cells (Day 2)	Gapdh	ova high	2.51272	0.302311	7.21204e+06	0.593952	8.51268e-40	1.72512e-38	94.1748	88.9251
Myeloid Cells (Day 2)	Msn	ova high	1.58089	0.30201	7.33929e+06	0.604432	2.99292e-49	9.10425e-48	84.8301	74.0024
Myeloid Cells (Day 2)	Prkcd	ova high	1.05569	0.301792	7.29687e+06	0.600938	7.78674e-50	2.46156e-48	67.0307	49.8575
Myeloid Cells (Day 2)	Ifi204	ova high	1.06927	0.301771	7129034	0.587116	2.76569e-39	5.423e-38	60.2751	43.9943
Myeloid Cells (Day 2)	Cyfip1	ova high	0.893836	0.301626	7401463	0.609552	1.96644e-60	8.88881e-59	65.0081	43.5871
Myeloid Cells (Day 2)	Emp3	ova high	0.863146	0.301003	7362547	0.606347	8.06799e-61	3.70464e-59	59.1424	36.3803
Myeloid Cells (Day 2)	Ifit1	ova high	0.880056	0.30035	7.22271e+06	0.594831	1.32727e-49	4.12392e-48	55.0162	36.1156
Myeloid Cells (Day 2)	Samhd1	ova high	2.17488	0.300316	7284711	0.599937	7.76313e-45	1.95901e-43	92.1926	86.0546
Myeloid Cells (Day 2)	Atp6v1a	ova high	0.756908	0.30021	7.44374e+06	0.613034	1.21325e-69	7.39678e-68	57.4434	35.0163
Myeloid Cells (Day 2)	Hsp90b1	ova high	1.15398	0.298651	7.23754e+06	0.596052	4.50523e-44	1.10424e-42	72.0874	54.8249
Myeloid Cells (Day 2)	Nfkbiz	ova high	1.05335	0.297328	7233691	0.595735	2.27466e-45	5.91493e-44	65.979	48.5138
Myeloid Cells (Day 2)	Flna	ova high	0.823897	0.296414	7379996	0.607784	9.51571e-61	4.34191e-59	61.1246	39.3119
Myeloid Cells (Day 2)	Gls	ova high	1.27936	0.296277	7.2751e+06	0.599146	1.71642e-45	4.47133e-44	79.3285	62.6018
Myeloid Cells (Day 2)	Gpi1	ova high	0.834244	0.29624	7.36993e+06	0.606955	6.33624e-60	2.7945e-58	59.4256	39.9634
Myeloid Cells (Day 2)	Tuba1c	ova high	0.79199	0.296191	7.42388e+06	0.611398	2.34392e-65	1.25964e-63	61.3269	37.8461
Myeloid Cells (Day 2)	Rassf2	ova high	0.876403	0.295958	7.32944e+06	0.603621	6.42305e-56	2.5464e-54	62.2977	39.7394
Myeloid Cells (Day 2)	Rab32	ova high	0.716552	0.295032	7448965	0.613464	1.17699e-72	8.13247e-71	55.2589	31.9829
Myeloid Cells (Day 2)	Vasp	ova high	0.879974	0.294935	7.30423e+06	0.601545	1.57986e-53	5.73093e-52	59.3447	41.9585
Myeloid Cells (Day 2)	Rnf114	ova high	0.921465	0.294601	7344554	0.604865	1.42494e-54	5.38434e-53	66.788	46.1319
Myeloid Cells (Day 2)	Magohb	ova high	0.814699	0.294173	7.19411e+06	0.592475	2.4103e-49	7.39396e-48	50.9304	33.1026
Myeloid Cells (Day 2)	Tmem106a	ova high	0.735497	0.29415	7.44302e+06	0.612974	2.29089e-70	1.45157e-68	56.6748	33.9984
Myeloid Cells (Day 2)	Pcbp1	ova high	1.42946	0.293679	7278427	0.599419	4.59109e-45	1.17283e-43	83.212	69.6458
Myeloid Cells (Day 2)	Wdr1	ova high	1.08934	0.293089	7296565	0.600913	2.93455e-48	8.51608e-47	73.0583	55.7003
Myeloid Cells (Day 2)	H2-K1	ova high	3.74407	0.292983	8169308	0.672788	3.99406e-130	1.34776e-127	99.7573	99.5928
Myeloid Cells (Day 2)	Ptpn6	ova high	1.06867	0.292155	7142014	0.588185	3.36671e-39	6.56598e-38	62.4595	47.8217
Myeloid Cells (Day 2)	Hcls1	ova high	0.834971	0.289298	7242346	0.596448	1.64251e-50	5.31982e-49	55.0162	38.009
Myeloid Cells (Day 2)	Ifi47	ova high	1.18688	0.289264	7.12551e+06	0.586826	6.23477e-37	1.09127e-35	67.1926	52.5041
Myeloid Cells (Day 2)	Dync1h1	ova high	0.72495	0.288563	7475614	0.615659	1.1884e-72	8.17237e-71	59.021	34.5277
Myeloid Cells (Day 2)	Lnpep	ova high	0.90628	0.288373	7333318	0.60394	4.79734e-54	1.77575e-52	66.3026	44.8493
Myeloid Cells (Day 2)	Lasp1	ova high	0.651912	0.288003	7.47739e+06	0.615805	8.51066e-78	7.01646e-76	53.5599	29.8249
Myeloid Cells (Day 2)	Coa5	ova high	0.787095	0.287057	7.39031e+06	0.608634	3.23333e-62	1.59036e-60	60.1133	38.5179
Myeloid Cells (Day 2)	Arhgdia	ova high	1.37787	0.284919	7243178	0.596516	1.12943e-42	2.59715e-41	82.3625	68.3225
Myeloid Cells (Day 2)	Glrx	ova high	0.870056	0.283693	7.09068e+06	0.583957	1.11982e-38	2.12956e-37	53.1553	39.0269
Myeloid Cells (Day 2)	Grk2	ova high	0.91774	0.281863	7292759	0.6006	2.02593e-50	6.51801e-49	65.0485	46.7834
Myeloid Cells (Day 2)	Ppp2ca	ova high	1.13391	0.281839	7.25666e+06	0.597626	5.57153e-45	1.4183e-43	73.2605	57.899
Myeloid Cells (Day 2)	Slc6a6	ova high	1.24312	0.281252	7.18434e+06	0.591671	2.24978e-39	4.44745e-38	77.5485	60.7288
Myeloid Cells (Day 2)	Arpc5	ova high	1.67492	0.280457	7.26008e+06	0.597908	2.84651e-43	6.72686e-42	88.9159	78.7256
Myeloid Cells (Day 2)	Fyb	ova high	0.897746	0.279977	7.166e+06	0.59016	1.77112e-43	4.24075e-42	56.8366	39.943
Myeloid Cells (Day 2)	Birc3	ova high	0.933001	0.27992	7256600	0.597622	1.92721e-47	5.41935e-46	66.8285	46.5187
Myeloid Cells (Day 2)	Actr2	ova high	1.61219	0.279075	7254571	0.597455	5.63863e-43	1.31538e-41	87.3786	76.5472
Myeloid Cells (Day 2)	Cltc	ova high	1.00394	0.277849	7.27408e+06	0.599061	2.94204e-47	8.19368e-46	71.7233	51.8933
Myeloid Cells (Day 2)	Ptprj	ova high	0.637403	0.276972	7416976	0.61083	5.7763e-73	4.02953e-71	51.4563	28.7866
Myeloid Cells (Day 2)	Fam49b	ova high	1.61619	0.275218	7.09947e+06	0.584681	3.82802e-33	5.8468e-32	80.0566	71.8037
Myeloid Cells (Day 2)	Ddx3x	ova high	1.04075	0.274503	7.21159e+06	0.593915	1.04863e-42	2.42673e-41	70.6715	52.0765
Myeloid Cells (Day 2)	Arl8a	ova high	0.645613	0.274097	7.46233e+06	0.614565	1.74737e-75	1.33444e-73	54.4498	30.3135
Myeloid Cells (Day 2)	Azin1	ova high	0.632369	0.273365	7386829	0.608347	5.37071e-70	3.31613e-68	50.8495	28.8477
Myeloid Cells (Day 2)	Sppl2a	ova high	1.17043	0.272326	7192489	0.592342	2.70403e-40	5.66987e-39	74.1909	58.6523
Myeloid Cells (Day 2)	Ptafr	ova high	0.734937	0.271801	7.23686e+06	0.595996	2.02556e-53	7.27497e-52	51.9013	31.8404
Myeloid Cells (Day 2)	Rac2	ova high	0.884809	0.2717	7.10401e+06	0.585055	1.50155e-39	2.9805e-38	54.8948	38.4976
Myeloid Cells (Day 2)	Arpc2	ova high	2.28277	0.271472	7366236	0.606651	9.19172e-51	3.01065e-49	95.0647	89.943
Myeloid Cells (Day 2)	Rnf213	ova high	0.988681	0.271271	7155954	0.589333	4.70458e-40	9.738e-39	63.5922	47.9235
Myeloid Cells (Day 2)	Oasl1	ova high	0.7678	0.270989	7.23469e+06	0.595817	2.27186e-51	7.54341e-50	54.1262	34.7109
Myeloid Cells (Day 2)	Ssr3	ova high	0.840825	0.269934	7.29123e+06	0.600473	2.48372e-51	8.22805e-50	63.6327	43.5057
Myeloid Cells (Day 2)	Ncf2	ova high	0.657824	0.26959	7.36335e+06	0.606413	2.44487e-67	1.38035e-65	51.335	28.9495
Myeloid Cells (Day 2)	Ddx17	ova high	0.880185	0.26957	7.27037e+06	0.598756	5.54107e-49	1.66118e-47	65.6958	45.0733
Myeloid Cells (Day 2)	Ptp4a1	ova high	0.822548	0.26905	7287938	0.600203	6.89463e-52	2.34288e-50	61.9741	41.5309
Myeloid Cells (Day 2)	Esd	ova high	1.00239	0.268053	7.06055e+06	0.581476	5.4175e-33	8.18833e-32	64.4822	51.7508
Myeloid Cells (Day 2)	Brd2	ova high	1.21475	0.267349	7.1635e+06	0.589955	5.45029e-38	9.99794e-37	76.0518	61.3396
Myeloid Cells (Day 2)	Litaf	ova high	0.97679	0.267182	7.21183e+06	0.593934	2.91e-43	6.8657e-42	68.4466	49.8982
Myeloid Cells (Day 2)	Neat1	ova high	1.50141	0.266845	7004695	0.576876	8.61736e-28	9.84551e-27	80.7443	66.7549
Myeloid Cells (Day 2)	Tap1	ova high	1.35373	0.266587	7.2147e+06	0.594171	1.00358e-40	2.13519e-39	81.1489	68.6482
Myeloid Cells (Day 2)	Clic4	ova high	1.53655	0.266584	7049007	0.580525	4.69144e-30	6.16043e-29	83.657	72.1498
Myeloid Cells (Day 2)	Usp25	ova high	0.776399	0.265738	7.29062e+06	0.600423	1.87409e-53	6.76443e-52	59.6278	38.7011
Myeloid Cells (Day 2)	Lims1	ova high	0.875973	0.264891	7.22013e+06	0.594619	6.89869e-46	1.83333e-44	62.055	43.6482
Myeloid Cells (Day 2)	Mdm2	ova high	0.621475	0.264683	7.3771e+06	0.607545	5.61774e-69	3.36832e-67	51.2945	28.6441
Myeloid Cells (Day 2)	Pdcd6ip	ova high	0.745355	0.264194	7.3192e+06	0.602777	1.68812e-56	6.86125e-55	58.7379	37.6221
Myeloid Cells (Day 2)	Ms4a4c	ova high	1.53261	0.264123	6.71119e+06	0.552704	1.25333e-14	6.29487e-14	64.3204	53.6849
Myeloid Cells (Day 2)	Cdkn1a	ova high	1.41036	0.262025	6.98375e+06	0.575151	5.77405e-27	6.31837e-26	75.3641	62.6832
Myeloid Cells (Day 2)	Itgb2	ova high	0.770811	0.261399	7136192	0.587705	5.57668e-44	1.36455e-42	51.2136	34.4259
Myeloid Cells (Day 2)	Pbxip1	ova high	0.629835	0.260222	7369797	0.606944	3.04061e-68	1.77186e-66	51.699	28.4202
Myeloid Cells (Day 2)	Arhgdib	ova high	1.59427	0.255789	6918122	0.569746	2.9804e-23	2.58491e-22	75.9304	66.8567
Myeloid Cells (Day 2)	Pgap2	ova high	1.01666	0.255126	7135235	0.587627	2.4e-37	4.27289e-36	70.1861	52.7484
Myeloid Cells (Day 2)	Ctsa	ova high	0.67966	0.252282	7.21179e+06	0.593931	7.49337e-52	2.54039e-50	50.5663	31.25
Myeloid Cells (Day 2)	Celf1	ova high	0.669975	0.251759	7.29079e+06	0.600437	6.16294e-57	2.52611e-55	54.2476	33.2655
Myeloid Cells (Day 2)	Tmbim6	ova high	1.36536	0.250643	7108535	0.585428	7.47273e-34	1.17348e-32	80.1375	68.4446
Myeloid Cells (Day 2)	H2-Eb1	ova low	2.2046	0.699051	7696910	0.633884	4.41158e-81	3.9759e-79	72.7199	63.9563
Myeloid Cells (Day 2)	Cd74	ova low	3.15372	0.690293	7981257	0.657301	2.78404e-108	5.53376e-106	91.9992	86.6505
Myeloid Cells (Day 2)	Malat1	ova low	5.81677	0.661152	8.68557e+06	0.715306	6.45821e-201	1.87417e-197	99.7964	99.8786
Myeloid Cells (Day 2)	Tmsb10	ova low	3.26923	0.631963	8422649	0.693652	6.07186e-163	5.87351e-160	96.5594	94.0939
Myeloid Cells (Day 2)	H2-Aa	ova low	2.41262	0.520503	7387942	0.608438	3.01043e-53	1.07855e-51	76.6694	70.0243
Myeloid Cells (Day 2)	Uba52	ova low	1.95889	0.509049	8359815	0.688478	8.30219e-155	4.81859e-152	89.7394	80.623
Myeloid Cells (Day 2)	Rpl39	ova low	3.5711	0.487695	8.39468e+06	0.691349	3.95331e-159	2.60739e-156	97.842	95.712
Myeloid Cells (Day 2)	H2-Ab1	ova low	2.06244	0.48095	7149636	0.588813	2.46715e-37	4.38705e-36	65.4316	62.1359
Myeloid Cells (Day 2)	Ubb	ova low	2.89682	0.403488	8.39505e+06	0.69138	3.50884e-159	2.42444e-156	97.6384	95.267
Myeloid Cells (Day 2)	Rpl34	ova low	3.30008	0.400446	8333511	0.686311	5.76208e-151	2.88303e-148	98.0049	96.2379
Myeloid Cells (Day 2)	Rpl18a	ova low	2.98038	0.39742	8354187	0.688014	1.05777e-153	5.68452e-151	97.8624	95.3883
Myeloid Cells (Day 2)	Rpl21	ova low	2.76069	0.396811	7.90985e+06	0.65142	2.12842e-100	3.15137e-98	96.2541	92.8803
Myeloid Cells (Day 2)	S100a4	ova low	1.89794	0.396732	7139306	0.587962	7.78714e-36	1.30929e-34	72.3331	70.712
Myeloid Cells (Day 2)	Rps11	ova low	3.2381	0.396488	8.22855e+06	0.677667	1.82185e-137	7.34308e-135	97.8217	95.8333
Myeloid Cells (Day 2)	Rps27	ova low	3.57146	0.364803	8178499	0.673545	2.99115e-131	1.05858e-128	98.8396	97.5324
Myeloid Cells (Day 2)	Rpl27	ova low	2.7961	0.356702	8131651	0.669687	1.41895e-125	4.28936e-123	97.048	93.9725
Myeloid Cells (Day 2)	Rps24	ova low	3.76825	0.354291	8310201	0.684392	6.54773e-148	3.06476e-145	98.6971	98.0178
Myeloid Cells (Day 2)	Atox1	ova low	2.69678	0.342143	7811895	0.643353	3.49636e-90	4.09131e-88	96.2744	94.1343
Myeloid Cells (Day 2)	Rpl32	ova low	2.90608	0.340673	7.78668e+06	0.641277	1.20927e-87	1.30944e-85	96.4373	94.0939
Myeloid Cells (Day 2)	Lsp1	ova low	2.26996	0.340568	6896373	0.567955	1.05285e-21	8.31168e-21	84.9145	77.3058
Myeloid Cells (Day 2)	Crip1	ova low	2.99633	0.320829	6.68091e+06	0.55021	1.64928e-12	7.04268e-12	87.5407	84.6683
Myeloid Cells (Day 2)	Fau	ova low	4.23087	0.317929	8.48776e+06	0.699014	5.79735e-172	8.80012e-169	99.4096	99.11
Myeloid Cells (Day 2)	S100a6	ova low	2.31855	0.313421	7068603	0.582139	6.76602e-31	9.27054e-30	84.9552	84.8706
Myeloid Cells (Day 2)	Rpl11	ova low	2.81577	0.313308	7.93232e+06	0.653271	8.17962e-103	1.2762e-100	96.8241	95.1861
Myeloid Cells (Day 2)	Rpl12	ova low	2.07588	0.309179	7.48384e+06	0.616336	3.83655e-60	1.70762e-58	88.0293	86.0437
Myeloid Cells (Day 2)	Cst3	ova low	3.60685	0.307404	7.00009e+06	0.576496	6.24511e-27	6.82354e-26	97.8217	97.0469
Myeloid Cells (Day 2)	Sub1	ova low	2.68881	0.306182	7.39654e+06	0.609147	4.65522e-53	1.65557e-51	95.7248	93.5275
Myeloid Cells (Day 2)	Rps13	ova low	2.84684	0.301687	7.76187e+06	0.639233	3.52196e-85	3.59885e-83	96.6612	94.4984
Myeloid Cells (Day 2)	Rpl36	ova low	2.79043	0.293944	7687339	0.633095	5.33493e-78	4.42342e-76	96.478	94.2152
Myeloid Cells (Day 2)	Rps15a	ova low	3.00075	0.287301	7570124	0.623442	2.35194e-67	1.33307e-65	96.702	94.5388
Myeloid Cells (Day 2)	Rps7	ova low	2.54867	0.286529	7.57458e+06	0.623809	9.35796e-68	5.38825e-66	94.5236	92.8398
Myeloid Cells (Day 2)	Rpl27a	ova low	3.44647	0.28478	7.81096e+06	0.643277	4.4188e-90	5.08863e-88	98.6767	97.7346
Myeloid Cells (Day 2)	Rpl26	ova low	3.0527	0.284203	7.69563e+06	0.633778	8.88261e-79	7.67183e-77	97.5977	95.9951
Myeloid Cells (Day 2)	Rps18	ova low	2.63003	0.28233	7504928	0.618073	8.62846e-62	4.11839e-60	94.1979	92.7994
Myeloid Cells (Day 2)	Tbc1d4	ova low	1.637	0.280635	6737512	0.554872	1.47585e-15	7.94189e-15	60.5456	57.1602
Myeloid Cells (Day 2)	Rps23	ova low	2.89002	0.277176	7636071	0.628873	3.0371e-73	2.1816e-71	97.0073	95.0243
Myeloid Cells (Day 2)	Pfdn5	ova low	1.83139	0.274182	7.46696e+06	0.614946	1.00024e-58	4.24371e-57	89.8616	86.165
Myeloid Cells (Day 2)	Rps21	ova low	3.16597	0.273647	7.75029e+06	0.63828	4.87072e-84	4.80777e-82	97.9031	96.5615
Myeloid Cells (Day 2)	Gm11808	ova low	1.02267	0.265616	7.30196e+06	0.601357	4.45356e-48	1.28728e-46	66.4495	60.4369
Myeloid Cells (Day 2)	Rps19	ova low	3.45683	0.263221	7.19594e+06	0.592626	1.06216e-38	2.02522e-37	98.5749	96.9256
Myeloid Cells (Day 2)	Cd52	ova low	2.87807	0.262906	6876352	0.566306	1.20869e-20	8.93433e-20	93.2207	90.0485
Myeloid Cells (Day 2)	Ppia	ova low	2.95644	0.260885	7.66745e+06	0.631458	3.91887e-76	3.05714e-74	97.5977	96.2783
Myeloid Cells (Day 2)	Rpl28	ova low	2.66025	0.256446	7553301	0.622057	6.81321e-66	3.70261e-64	96.3966	94.8625
Myeloid Cells (Day 2)	Cox8a	ova low	2.31876	0.256025	7.36292e+06	0.606378	1.67134e-50	5.38913e-49	93.4243	91.1812
Myeloid Cells (Day 2)	Rpl30	ova low	3.01546	0.25063	7405763	0.609906	9.0435e-54	3.31367e-52	97.1906	95.1052

## Sheet: Myeloid_Day_14
Sample	gene	group	avgExpr	logFC	statistic	auc	pval	padj	pct_in	pct_out
Myeloid Cells (Day 14)	Fcgr4	ova high	1.65106	1.22951	2.41558e+06	0.72716	2.6955e-163	3.78611e-159	60.8175	19.4143
Myeloid Cells (Day 14)	Cd72	ova high	1.54361	1.07528	2427069	0.730619	9.07311e-152	6.37205e-148	65.6032	24.5169
Myeloid Cells (Day 14)	Pou2f2	ova high	1.61699	0.91916	2.38526e+06	0.718034	2.56676e-115	3.60527e-112	72.8814	37.8925
Myeloid Cells (Day 14)	Wfdc17	ova high	2.23709	0.895423	2203535	0.663329	3.44233e-59	5.62221e-57	75.2742	55.4046
Myeloid Cells (Day 14)	Acp5	ova high	1.28334	0.877337	2365002	0.711935	2.33108e-133	5.45705e-130	61.7149	23.128
Myeloid Cells (Day 14)	Rgs1	ova high	1.96416	0.864299	2307399	0.694595	2.49787e-83	1.09641e-80	82.652	52.8986
Myeloid Cells (Day 14)	Atp2b1	ova high	1.95489	0.771932	2408250	0.724954	1.21796e-105	1.1405e-102	89.8305	68.2065
Myeloid Cells (Day 14)	Itm2b	ova high	3.03035	0.748962	2.44402e+06	0.73572	1.24448e-113	1.58909e-110	97.5075	94.6256
Myeloid Cells (Day 14)	Clec4a1	ova high	1.47429	0.727845	2248426	0.676842	2.87148e-76	8.768e-74	66.4008	40.2778
Myeloid Cells (Day 14)	Prkcb	ova high	1.20303	0.719524	2.27786e+06	0.685704	2.88569e-90	1.62129e-87	61.0169	33.7258
Myeloid Cells (Day 14)	Gm42418	ova high	3.26493	0.697915	2219577	0.668158	9.46149e-59	1.51018e-56	97.6072	95.5918
Myeloid Cells (Day 14)	Ccl5	ova high	2.01566	0.685213	1950559	0.587175	9.37657e-20	2.10389e-18	58.1256	43.2065
Myeloid Cells (Day 14)	Clec4a3	ova high	1.57414	0.682623	2.17482e+06	0.654686	1.08129e-57	1.68753e-55	66.5005	42.8442
Myeloid Cells (Day 14)	Fcer1g	ova high	2.95345	0.681502	2155875	0.648981	1.14575e-46	1.13332e-44	90.7278	82.5181
Myeloid Cells (Day 14)	Pltp	ova high	1.11441	0.674916	2.24407e+06	0.675531	1.35728e-91	7.94346e-89	57.8265	24.6679
Myeloid Cells (Day 14)	Basp1	ova high	1.8351	0.649769	2212286	0.665963	3.41836e-59	5.62221e-57	85.6431	62.349
Myeloid Cells (Day 14)	Tmem176a	ova high	2.07473	0.644956	2.13474e+06	0.642618	5.25088e-44	4.49719e-42	88.1356	63.3152
Myeloid Cells (Day 14)	Tmem123	ova high	1.84376	0.637096	2106855	0.634225	4.86778e-40	3.5063e-38	77.9661	58.2428
Myeloid Cells (Day 14)	Ccnd2	ova high	0.848575	0.633993	2303266	0.693351	2.20136e-138	6.18405e-135	52.2433	14.6739
Myeloid Cells (Day 14)	Sirpa	ova high	1.46734	0.633572	2203381	0.663282	7.59686e-62	1.38578e-59	68.4945	47.9167
Myeloid Cells (Day 14)	Lnpep	ova high	1.29585	0.630763	2.35081e+06	0.707662	9.50061e-97	6.67228e-94	75.8724	49.849
Myeloid Cells (Day 14)	Cd300e	ova high	0.885154	0.62855	2288695	0.688964	4.0479e-128	6.31742e-125	53.2403	15.7307
Myeloid Cells (Day 14)	Tcf7l2	ova high	0.957818	0.626049	2290529	0.689516	1.21079e-106	1.21477e-103	58.2253	24.4263
Myeloid Cells (Day 14)	Itgam	ova high	0.993016	0.614085	2.21737e+06	0.667494	7.64915e-85	3.58133e-82	54.337	24.7283
Myeloid Cells (Day 14)	Nfkbiz	ova high	1.23942	0.584556	2243220	0.675275	2.60688e-72	6.90873e-70	71.4855	43.901
Myeloid Cells (Day 14)	Marcks	ova high	2.26466	0.57809	2196526	0.661219	2.30583e-54	3.08454e-52	91.1266	81.7331
Myeloid Cells (Day 14)	Gngt2	ova high	1.78336	0.576795	2.06904e+06	0.62284	1.61336e-34	8.99255e-33	73.679	53.8345
Myeloid Cells (Day 14)	Fam49a	ova high	1.3978	0.531992	2220038	0.668296	4.86663e-62	8.99431e-60	81.7547	56.5519
Myeloid Cells (Day 14)	Tmem176b	ova high	2.00853	0.524958	2.04847e+06	0.616649	8.52356e-30	3.82498e-28	87.9362	66.9686
Myeloid Cells (Day 14)	Syk	ova high	1.15449	0.521551	2.18358e+06	0.657321	3.36838e-59	5.62221e-57	65.7029	44.1123
Myeloid Cells (Day 14)	Abcg1	ova high	1.1106	0.514938	2237386	0.673519	7.72855e-71	1.90448e-68	70.8873	44.2331
Myeloid Cells (Day 14)	Lcp2	ova high	0.98961	0.511221	2180925	0.656522	8.2547e-65	1.65637e-62	59.1226	34.0882
Myeloid Cells (Day 14)	Lst1	ova high	2.08512	0.509305	1992022	0.599657	2.31471e-22	6.30086e-21	78.5643	65.7911
Myeloid Cells (Day 14)	Grn	ova high	1.26245	0.50809	2165836	0.65198	1.33824e-52	1.70881e-50	68.7936	52.3249
Myeloid Cells (Day 14)	Ighm	ova high	1.11512	0.502446	2.13476e+06	0.642626	4.47934e-49	5.15711e-47	62.4128	44.8068
Myeloid Cells (Day 14)	Vasp	ova high	1.23949	0.487472	2.17552e+06	0.654896	7.22003e-54	9.30391e-52	70.6879	54.68
Myeloid Cells (Day 14)	Clec4b1	ova high	0.837188	0.47423	2151246	0.647588	4.1724e-69	9.7676e-67	51.9442	22.8865
Myeloid Cells (Day 14)	Lamp1	ova high	1.76865	0.474066	2.0968e+06	0.631198	4.40926e-37	2.7283e-35	88.2353	69.5048
Myeloid Cells (Day 14)	Canx	ova high	1.28206	0.472641	2.21525e+06	0.666856	1.15084e-60	2.0724e-58	76.9691	59.7826
Myeloid Cells (Day 14)	Ctsd	ova high	0.817696	0.464177	2.15027e+06	0.647296	1.15939e-66	2.50535e-64	52.2433	24.7585
Myeloid Cells (Day 14)	Ehd1	ova high	0.771064	0.462356	2211082	0.6656	2.9285e-81	1.1426e-78	56.0319	25.6039
Myeloid Cells (Day 14)	Lgmn	ova high	0.829059	0.4611	2188125	0.65869	3.13969e-72	8.16668e-70	57.6271	27.5966
Myeloid Cells (Day 14)	Wnk1	ova high	1.60537	0.455761	2.11547e+06	0.636818	2.68255e-40	1.97273e-38	84.6461	68.7198
Myeloid Cells (Day 14)	Bmt2	ova high	0.8635	0.454528	2.20557e+06	0.66394	5.80085e-71	1.45498e-68	63.011	32.8502
Myeloid Cells (Day 14)	Gadd45b	ova high	1.89014	0.453337	2.01004e+06	0.60508	1.56758e-24	4.9928e-23	85.1446	66.8478
Myeloid Cells (Day 14)	Ptpn6	ova high	1.34847	0.450655	2112316	0.635869	2.9688e-41	2.24193e-39	72.682	57.8804
Myeloid Cells (Day 14)	Zeb2	ova high	1.70033	0.449276	2.04655e+06	0.616071	5.15171e-30	2.34178e-28	77.4676	62.4698
Myeloid Cells (Day 14)	Man2a1	ova high	0.849788	0.448653	2154104	0.648448	1.17241e-59	2.03305e-57	57.2283	32.7899
Myeloid Cells (Day 14)	Hnrnph1	ova high	1.23333	0.446563	2.18195e+06	0.656831	5.85741e-54	7.61789e-52	76.7697	58.9372
Myeloid Cells (Day 14)	F11r	ova high	0.659208	0.442851	2228657	0.670891	4.83009e-102	4.24022e-99	51.346	17.663
Myeloid Cells (Day 14)	Bcl2a1b	ova high	1.8628	0.436977	1.9997e+06	0.60197	3.81199e-23	1.0972e-21	86.0419	67.7838
Myeloid Cells (Day 14)	Ptprj	ova high	0.810684	0.431706	2.16724e+06	0.652404	8.49601e-64	1.68077e-61	57.4277	31.3104
Myeloid Cells (Day 14)	Ms4a6d	ova high	0.901703	0.430188	2098177	0.631613	8.08132e-50	9.45918e-48	55.1346	29.0157
Myeloid Cells (Day 14)	Rap1b	ova high	1.72605	0.429858	2.16821e+06	0.652694	3.87191e-49	4.49461e-47	85.5434	78.2005
Myeloid Cells (Day 14)	Gnb1	ova high	1.45603	0.421379	2207321	0.664468	2.84593e-57	4.345e-55	83.0508	71.0145
Myeloid Cells (Day 14)	Clec4a2	ova high	0.942228	0.417021	2074646	0.624529	4.22833e-43	3.47317e-41	55.7328	32.0048
Myeloid Cells (Day 14)	Ptp4a2	ova high	1.53723	0.415746	2152379	0.647929	1.11563e-46	1.11136e-44	77.9661	72.494
Myeloid Cells (Day 14)	Fnbp1l	ova high	0.751726	0.414743	2.20221e+06	0.662929	2.85061e-78	9.76579e-76	58.6241	25.2114
Myeloid Cells (Day 14)	Sod1	ova high	1.33467	0.414458	2.13482e+06	0.642643	2.8319e-44	2.47061e-42	79.3619	63.4964
Myeloid Cells (Day 14)	Sh3bgrl	ova high	1.36764	0.408717	2.14004e+06	0.644215	4.63174e-45	4.19725e-43	76.3709	65.8514
Myeloid Cells (Day 14)	BC005537	ova high	1.29563	0.408136	2.15325e+06	0.64819	1.05653e-47	1.09926e-45	78.7637	63.1944
Myeloid Cells (Day 14)	Grk3	ova high	1.23693	0.405257	2.12163e+06	0.638672	1.48903e-42	1.18835e-40	75.8724	59.3599
Myeloid Cells (Day 14)	Ms4a6c	ova high	1.84711	0.403071	1.94405e+06	0.585217	6.26166e-17	1.11755e-15	72.9811	63.4964
Myeloid Cells (Day 14)	Id2	ova high	1.83976	0.402396	1.9544e+06	0.588332	6.36044e-18	1.22382e-16	79.4616	65.0966
Myeloid Cells (Day 14)	Nxpe4	ova high	0.698511	0.401147	2.14967e+06	0.647113	1.93419e-70	4.68406e-68	51.346	21.6184
Myeloid Cells (Day 14)	Adgre4	ova high	0.838248	0.400438	2.07537e+06	0.624748	2.90751e-46	2.79718e-44	51.9442	27.808
Myeloid Cells (Day 14)	AW112010	ova high	1.48973	0.398011	1985808	0.597786	4.85561e-22	1.30156e-20	74.7757	59.058
Myeloid Cells (Day 14)	Rac2	ova high	1.13147	0.390307	2.04048e+06	0.614245	1.46487e-31	7.19425e-30	63.4098	47.2524
Myeloid Cells (Day 14)	Cd47	ova high	2.14092	0.386689	2199191	0.662021	1.05682e-54	1.42732e-52	94.6162	90.2476
Myeloid Cells (Day 14)	Cflar	ova high	1.02026	0.386441	2.1069e+06	0.634237	4.78325e-43	3.90614e-41	69.1924	45.0181
Myeloid Cells (Day 14)	Pycard	ova high	1.30004	0.38445	2072422	0.62386	3.87813e-34	2.11954e-32	72.8814	61.8056
Myeloid Cells (Day 14)	Stk17b	ova high	1.26076	0.380118	2072093	0.623761	1.64325e-34	9.12293e-33	73.3799	57.7597
Myeloid Cells (Day 14)	Eif4g2	ova high	1.41824	0.37907	2.14105e+06	0.64452	1.09785e-44	9.82189e-43	81.5553	70.6522
Myeloid Cells (Day 14)	Pld4	ova high	1.38581	0.376384	2042572	0.614874	1.38784e-29	6.16887e-28	69.6909	62.9529
Myeloid Cells (Day 14)	Selplg	ova high	1.58515	0.375453	2106296	0.634057	2.18123e-38	1.41187e-36	86.8395	74.9094
Myeloid Cells (Day 14)	Mef2a	ova high	1.1437	0.37451	2099469	0.632002	3.52228e-39	2.41336e-37	73.679	56.5519
Myeloid Cells (Day 14)	Serinc3	ova high	1.27136	0.37422	2063987	0.621321	4.61598e-33	2.38368e-31	73.1805	59.3297
Myeloid Cells (Day 14)	Laptm5	ova high	2.2888	0.369019	2169290	0.65302	5.53758e-49	6.32365e-47	91.9242	91.5157
Myeloid Cells (Day 14)	Il1b	ova high	1.37038	0.368474	1.95605e+06	0.588829	7.11411e-20	1.61429e-18	62.7119	46.1655
Myeloid Cells (Day 14)	Dusp2	ova high	0.963289	0.366318	2081755	0.626669	2.03988e-39	1.41144e-37	65.2044	42.6932
Myeloid Cells (Day 14)	Etv3	ova high	1.30082	0.363249	2.01241e+06	0.605793	9.29262e-26	3.19819e-24	74.1775	56.4915
Myeloid Cells (Day 14)	Tgfbi	ova high	1.08405	0.362302	1.97766e+06	0.595332	3.53781e-23	1.02247e-21	57.7268	44.1425
Myeloid Cells (Day 14)	Slc6a6	ova high	1.09036	0.359975	2.09728e+06	0.631343	4.39337e-39	2.98112e-37	73.5793	54.7101
Myeloid Cells (Day 14)	Swap70	ova high	0.979365	0.359793	2.05526e+06	0.618694	7.68505e-35	4.31777e-33	65.2044	42.6027
Myeloid Cells (Day 14)	Cd53	ova high	1.36326	0.359332	2.03041e+06	0.611214	6.34141e-28	2.53044e-26	67.8963	62.3792
Myeloid Cells (Day 14)	Bcl2a1a	ova high	1.22339	0.354792	2022382	0.608796	1.9132e-27	7.40297e-26	73.3799	53.8647
Myeloid Cells (Day 14)	Ddx6	ova high	1.08737	0.351887	2.09494e+06	0.630639	1.45893e-38	9.62072e-37	72.4826	55.8575
Myeloid Cells (Day 14)	Itgb2	ova high	1.11632	0.348349	2013459	0.60611	9.02409e-27	3.27526e-25	62.4128	52.2343
Myeloid Cells (Day 14)	Cx3cr1	ova high	0.892036	0.341381	1985899	0.597814	1.94992e-27	7.52435e-26	50.8475	32.8502
Myeloid Cells (Day 14)	Txnip	ova high	0.779953	0.34129	2041133	0.614441	7.36295e-37	4.49652e-35	52.6421	32.4879
Myeloid Cells (Day 14)	Samsn1	ova high	1.54655	0.340796	1954906	0.588484	4.05082e-18	7.92448e-17	78.2652	62.1679
Myeloid Cells (Day 14)	Pip4k2a	ova high	1.18957	0.340253	2.06244e+06	0.620855	1.10659e-32	5.67271e-31	72.9811	60.7488
Myeloid Cells (Day 14)	Dazap2	ova high	1.51385	0.338525	2106463	0.634107	2.12041e-38	1.37885e-36	82.8514	76.4795
Myeloid Cells (Day 14)	Stard7	ova high	0.65393	0.337346	2114210	0.636439	1.0291e-54	1.40338e-52	53.4397	27.7174
Myeloid Cells (Day 14)	Clic4	ova high	1.18948	0.334762	2026242	0.609958	1.51086e-27	5.87856e-26	72.8814	58.4239
Myeloid Cells (Day 14)	Rnf149	ova high	1.21155	0.333391	1.9873e+06	0.598235	8.84928e-23	2.48594e-21	67.0987	54.6498
Myeloid Cells (Day 14)	Stap1	ova high	0.777332	0.32993	2023938	0.609265	2.55612e-33	1.32975e-31	52.7418	33.6051
Myeloid Cells (Day 14)	Acsl5	ova high	0.665921	0.328984	2089194	0.628909	1.06527e-47	1.10021e-45	53.1406	29.8913
Myeloid Cells (Day 14)	Clec2d	ova high	1.10169	0.328214	2027763	0.610416	3.40428e-28	1.39814e-26	72.5823	54.3176
Myeloid Cells (Day 14)	Lyn	ova high	1.35273	0.326768	2010626	0.605257	6.54801e-25	2.13891e-23	71.3858	65.3382
Myeloid Cells (Day 14)	Gns	ova high	0.723836	0.326588	2.04613e+06	0.615945	3.42632e-37	2.12947e-35	52.4427	33.9674
Myeloid Cells (Day 14)	Rsrp1	ova high	1.29424	0.323928	2059967	0.62011	1.33418e-31	6.57541e-30	78.8634	67.814
Myeloid Cells (Day 14)	Tagln2	ova high	1.41355	0.320655	1939784	0.583932	1.9885e-16	3.39374e-15	74.9751	63.8889
Myeloid Cells (Day 14)	Rab8b	ova high	1.09569	0.317936	2.01904e+06	0.607789	9.20661e-27	3.33289e-25	70.4885	56.7331
Myeloid Cells (Day 14)	Nrip1	ova high	0.680694	0.316143	2040323	0.614197	7.74045e-38	4.91956e-36	51.0469	30.465
Myeloid Cells (Day 14)	Stat3	ova high	0.94604	0.314931	2044355	0.615411	1.50614e-31	7.37117e-30	65.8026	50.0604
Myeloid Cells (Day 14)	Cybb	ova high	1.47632	0.314382	1883248	0.566913	1.39746e-11	1.53589e-10	65.9023	50.9662
Myeloid Cells (Day 14)	Pirb	ova high	1.1281	0.313321	2009126	0.604806	1.91053e-25	6.43533e-24	70.3888	56.1896
Myeloid Cells (Day 14)	Ccdc50	ova high	0.991046	0.312965	2028654	0.610684	5.93324e-29	2.5408e-27	67.6969	50.8454
Myeloid Cells (Day 14)	Itm2c	ova high	1.01674	0.312328	2.00188e+06	0.602624	8.0313e-25	2.60962e-23	67.8963	53.3816
Myeloid Cells (Day 14)	Phip	ova high	0.961172	0.31213	2024028	0.609292	1.24216e-28	5.27113e-27	67.5972	48.3998
Myeloid Cells (Day 14)	Dusp1	ova high	2.20811	0.31079	1.99894e+06	0.60174	1.26177e-22	3.51644e-21	88.335	86.5942
Myeloid Cells (Day 14)	Rbms1	ova high	0.99385	0.310436	2.03221e+06	0.611756	2.1096e-29	9.23098e-28	65.6032	52.0531
Myeloid Cells (Day 14)	Zfp36	ova high	2.29209	0.310318	2041267	0.614481	3.60522e-28	1.47206e-26	93.1206	91.3647
Myeloid Cells (Day 14)	Foxp1	ova high	0.952229	0.306723	2.01499e+06	0.606572	1.27378e-27	4.9837e-26	64.6062	47.2524
Myeloid Cells (Day 14)	Birc2	ova high	1.04936	0.305467	1979950	0.596023	7.16199e-23	2.02003e-21	65.5035	45.9239
Myeloid Cells (Day 14)	Psma6	ova high	0.969136	0.303454	2024733	0.609504	3.75328e-28	1.52807e-26	66.2014	52.9589
Myeloid Cells (Day 14)	Ezr	ova high	0.761932	0.302994	2.02789e+06	0.610454	7.40807e-32	3.67681e-30	56.9292	39.0399
Myeloid Cells (Day 14)	Rap2b	ova high	0.787906	0.302679	2.03471e+06	0.612508	4.43035e-34	2.39341e-32	57.8265	35.2355
Myeloid Cells (Day 14)	Cblb	ova high	0.67162	0.301269	2.05567e+06	0.618817	7.8092e-41	5.83447e-39	53.1406	29.8007
Myeloid Cells (Day 14)	Tnip1	ova high	0.628473	0.300346	2072807	0.623976	3.04772e-45	2.79793e-43	52.4427	28.4118
Myeloid Cells (Day 14)	Arhgap30	ova high	1.20595	0.299213	2.03362e+06	0.612178	5.66183e-28	2.27868e-26	76.9691	65.0966
Myeloid Cells (Day 14)	Atp1a1	ova high	0.812885	0.299207	2.02432e+06	0.609379	3.00172e-30	1.37785e-28	59.2223	42.5121
Myeloid Cells (Day 14)	Rassf2	ova high	0.634465	0.297067	2.06769e+06	0.622434	7.44829e-45	6.70633e-43	52.4427	27.2947
Myeloid Cells (Day 14)	Nfkbia	ova high	2.01506	0.296906	1950380	0.587121	4.9148e-17	8.83909e-16	89.6311	82.82
Myeloid Cells (Day 14)	Tnfaip3	ova high	0.942567	0.295692	1999148	0.601802	9.67362e-26	3.31404e-24	63.1107	45.1691
Myeloid Cells (Day 14)	Plxnc1	ova high	0.90265	0.294867	1.9812e+06	0.596398	8.64818e-24	2.60112e-22	60.0199	42.6932
Myeloid Cells (Day 14)	Tpd52	ova high	1.17701	0.292779	1.9537e+06	0.58812	1.44351e-18	2.95562e-17	65.6032	56.0688
Myeloid Cells (Day 14)	Tspan3	ova high	0.823639	0.292071	1.98819e+06	0.598502	5.23815e-27	1.95159e-25	54.5364	34.3901
Myeloid Cells (Day 14)	Flna	ova high	1.13547	0.292065	1.99347e+06	0.600094	3.4112e-23	9.89952e-22	68.3948	58.6655
Myeloid Cells (Day 14)	Fus	ova high	1.56555	0.290356	2040869	0.614361	2.62019e-28	1.08245e-26	85.8425	78.4118
Myeloid Cells (Day 14)	Aebp2	ova high	0.999744	0.290176	1.98643e+06	0.597973	4.68353e-23	1.33438e-21	66.999	50.9058
Myeloid Cells (Day 14)	Mob1a	ova high	1.1602	0.289905	2036136	0.612937	1.9245e-28	8.04512e-27	74.676	64.1606
Myeloid Cells (Day 14)	B2m	ova high	3.81766	0.289731	2.13231e+06	0.641889	2.43958e-42	1.89317e-40	99.3021	99.3961
Myeloid Cells (Day 14)	Klf2	ova high	1.31235	0.288682	1.92085e+06	0.578231	9.08416e-15	1.35885e-13	67.1984	59.1486
Myeloid Cells (Day 14)	Serp1	ova high	1.28121	0.287331	1.97782e+06	0.595381	1.0726e-20	2.61558e-19	72.3829	65.9722
Myeloid Cells (Day 14)	Ptk2b	ova high	0.648242	0.287044	2041956	0.614689	4.93501e-39	3.33255e-37	51.346	28.6232
Myeloid Cells (Day 14)	Iqgap1	ova high	1.68332	0.285944	2.04139e+06	0.614519	2.52392e-28	1.04575e-26	83.9482	81.5821
Myeloid Cells (Day 14)	Abi1	ova high	0.982707	0.28452	2009366	0.604878	9.3127e-26	3.19819e-24	68.5942	54.0157
Myeloid Cells (Day 14)	Tmed10	ova high	1.17564	0.284243	1980769	0.596269	1.94551e-21	5.0418e-20	67.996	60.7186
Myeloid Cells (Day 14)	Sgpl1	ova high	0.612423	0.284228	2046552	0.616072	7.67915e-40	5.44754e-38	50.6481	29.0157
Myeloid Cells (Day 14)	Wdr1	ova high	1.00126	0.282955	2015817	0.60682	2.0926e-26	7.32982e-25	69.0927	56.2198
Myeloid Cells (Day 14)	Rassf3	ova high	0.755412	0.28159	2.01925e+06	0.607855	1.45158e-30	6.7513e-29	58.8235	38.0435
Myeloid Cells (Day 14)	Fam107b	ova high	0.745279	0.280063	2.01796e+06	0.607466	8.17849e-31	3.84819e-29	57.8265	36.6848
Myeloid Cells (Day 14)	Msn	ova high	1.61466	0.279961	2012242	0.605744	1.94309e-24	6.1748e-23	83.8485	79.1365
Myeloid Cells (Day 14)	Ncf2	ova high	0.82635	0.278598	1987897	0.598415	7.67994e-26	2.66352e-24	57.2283	38.0133
Myeloid Cells (Day 14)	Pgap2	ova high	0.853257	0.278061	2.00219e+06	0.602717	1.55695e-26	5.50856e-25	62.4128	43.3273
Myeloid Cells (Day 14)	Cd274	ova high	0.780216	0.277075	2.0011e+06	0.602388	1.42603e-28	6.03314e-27	57.0289	35.2657
Myeloid Cells (Day 14)	Atf4	ova high	1.06016	0.276468	2001428	0.602488	3.05867e-24	9.52595e-23	70.6879	57.9408
Myeloid Cells (Day 14)	Unc93b1	ova high	1.17764	0.276197	1970520	0.593184	3.24834e-20	7.56653e-19	67.6969	60.3563
Myeloid Cells (Day 14)	Dync1h1	ova high	0.691258	0.274966	2.03792e+06	0.613473	3.52031e-34	1.93149e-32	57.0289	36.8659
Myeloid Cells (Day 14)	Rnf19b	ova high	0.982315	0.274823	1.95326e+06	0.587987	6.87844e-19	1.45504e-17	65.6032	51.4795
Myeloid Cells (Day 14)	Ywhab	ova high	1.24374	0.272372	1998677	0.60166	3.51217e-23	1.01715e-21	73.8784	67.6932
Myeloid Cells (Day 14)	Rab10	ova high	0.920244	0.271703	2.0029e+06	0.602931	2.89072e-25	9.64444e-24	64.9053	51.6606
Myeloid Cells (Day 14)	Ddx17	ova high	0.794395	0.271373	2003597	0.603141	6.55058e-27	2.4213e-25	60.0199	43.1461
Myeloid Cells (Day 14)	Ctsa	ova high	0.953356	0.269434	1.95039e+06	0.587125	3.2018e-19	6.91885e-18	60.4187	46.4976
Myeloid Cells (Day 14)	Arhgef2	ova high	0.647283	0.269346	2.01099e+06	0.605366	1.26357e-31	6.24936e-30	51.7448	32.4275
Myeloid Cells (Day 14)	Fyb	ova high	1.22409	0.267892	1.92827e+06	0.580465	1.36753e-15	2.19524e-14	68.5942	57.6993
Myeloid Cells (Day 14)	Ptprc	ova high	2.53977	0.266685	2019408	0.607901	3.33346e-25	1.10952e-23	90.2293	93.5386
Myeloid Cells (Day 14)	Arpc5	ova high	1.68072	0.265608	2043089	0.61503	1.58307e-28	6.67744e-27	86.8395	82.6691
Myeloid Cells (Day 14)	Bcl2a1d	ova high	1.39761	0.264718	1.92163e+06	0.578467	1.87033e-14	2.73938e-13	77.9661	65.9118
Myeloid Cells (Day 14)	Osbpl8	ova high	0.67332	0.262853	2005946	0.603848	4.11799e-30	1.87796e-28	53.9382	33.6957
Myeloid Cells (Day 14)	Fgr	ova high	0.915024	0.262735	1941567	0.584469	2.63897e-18	5.24285e-17	58.325	45.8635
Myeloid Cells (Day 14)	Ptpre	ova high	0.782895	0.262181	1951290	0.587395	1.86424e-20	4.43815e-19	53.1406	40.7609
Myeloid Cells (Day 14)	Kctd12	ova high	1.14604	0.260681	1954922	0.588489	2.22233e-18	4.44656e-17	67.2981	60.5374
Myeloid Cells (Day 14)	Ikzf1	ova high	0.799184	0.260649	1.97547e+06	0.594673	4.0972e-23	1.17448e-21	57.7268	42.7234
Myeloid Cells (Day 14)	Gls	ova high	1.10523	0.26063	1.99016e+06	0.599096	1.60798e-22	4.45476e-21	71.7846	60.9903
Myeloid Cells (Day 14)	Actr2	ova high	1.51743	0.260042	2.03459e+06	0.61247	1.85097e-27	7.18198e-26	82.4526	78.4118
Myeloid Cells (Day 14)	Ttyh3	ova high	0.673473	0.259862	1.98757e+06	0.598315	2.34161e-27	8.91335e-26	52.2433	33.5447
Myeloid Cells (Day 14)	Efhd2	ova high	1.69718	0.259667	1996680	0.601059	2.08505e-22	5.69779e-21	87.0389	81.3708
Myeloid Cells (Day 14)	Ddx5	ova high	2.56547	0.258069	2093902	0.630326	5.44437e-36	3.22665e-34	98.006	96.9807
Myeloid Cells (Day 14)	Pdcd6ip	ova high	0.732127	0.258015	1997223	0.601223	1.28034e-26	4.58767e-25	56.9292	40.8514
Myeloid Cells (Day 14)	Cytip	ova high	1.43202	0.256368	1946131	0.585842	7.88799e-17	1.39716e-15	77.5673	71.5278
Myeloid Cells (Day 14)	Ptbp3	ova high	1.24367	0.255153	1987862	0.598405	9.80932e-22	2.58018e-20	76.3709	68.9312
Myeloid Cells (Day 14)	Gfpt1	ova high	0.822173	0.254892	1961195	0.590377	1.06373e-20	2.60161e-19	61.3161	45.1691
Myeloid Cells (Day 14)	Cyth4	ova high	0.811731	0.251818	1.936e+06	0.582794	5.15257e-18	9.99626e-17	54.5364	43.9614
Myeloid Cells (Day 14)	Galnt1	ova high	0.694598	0.251328	1.99311e+06	0.599985	8.16879e-27	2.98799e-25	56.1316	37.5302
Myeloid Cells (Day 14)	Ppp1r18	ova high	0.765499	0.251223	1.97796e+06	0.595425	2.44027e-23	7.126e-22	57.6271	43.4481
Myeloid Cells (Day 14)	Nxf1	ova high	0.709827	0.251179	1981816	0.596585	1.38312e-24	4.4456e-23	56.7298	39.8853
Myeloid Cells (Day 14)	Zfp36l2	ova high	1.2668	0.250586	1.8994e+06	0.571776	1.19526e-12	1.47787e-11	64.2074	60.5072
Myeloid Cells (Day 14)	Cd74	ova low	3.46678	1.44957	2438095	0.733938	1.7567e-112	2.05621e-109	86.5338	71.2861
Myeloid Cells (Day 14)	H2-Ab1	ova low	2.5844	1.2238	2.29818e+06	0.691821	4.59908e-78	1.53806e-75	73.0072	57.6271
Myeloid Cells (Day 14)	H2-Eb1	ova low	2.62778	1.21011	2.31285e+06	0.696237	3.22866e-81	1.22567e-78	74.9396	59.1226
Myeloid Cells (Day 14)	H2-Aa	ova low	2.74716	1.11864	2296337	0.691265	8.62633e-77	2.75376e-74	77.0531	63.5095
Myeloid Cells (Day 14)	Tmsb10	ova low	2.86255	0.976652	2493119	0.750502	3.57014e-128	6.26828e-125	92.6329	82.8514
Myeloid Cells (Day 14)	Plac8	ova low	1.64387	0.803701	2074571	0.624507	1.3632e-37	8.5863e-36	54.4082	33.6989
Myeloid Cells (Day 14)	H2-DMa	ova low	1.18106	0.659626	2.27626e+06	0.685222	1.46036e-76	4.55826e-74	63.3152	38.8833
Myeloid Cells (Day 14)	Plbd1	ova low	1.15612	0.57073	2.17449e+06	0.654584	2.84769e-54	3.77345e-52	61.0507	41.0768
Myeloid Cells (Day 14)	S100a11	ova low	1.94032	0.557843	2.16052e+06	0.650379	1.22766e-47	1.25867e-45	84.4203	71.2861
Myeloid Cells (Day 14)	H2-DMb1	ova low	0.869182	0.519136	2.16133e+06	0.650625	1.47102e-55	2.06619e-53	51.9928	29.9103
Myeloid Cells (Day 14)	Lyz2	ova low	1.77058	0.482265	1.8291e+06	0.550613	2.75436e-07	1.75614e-06	53.9855	49.4516
Myeloid Cells (Day 14)	Lsp1	ova low	2.16844	0.475528	1976473	0.594976	5.50617e-20	1.26995e-18	86.0205	69.4915
Myeloid Cells (Day 14)	Alox5ap	ova low	1.31789	0.445508	2.0843e+06	0.627435	5.21535e-36	3.10402e-34	67.9348	53.5394
Myeloid Cells (Day 14)	Ubb	ova low	2.78054	0.433564	2.23742e+06	0.673529	1.91719e-62	3.63903e-60	97.5242	93.8185
Myeloid Cells (Day 14)	Ifi27l2a	ova low	1.54459	0.413285	1871690	0.563433	1.61919e-10	1.59938e-09	56.5519	50.0499
Myeloid Cells (Day 14)	Ifitm3	ova low	1.64082	0.40206	1845696	0.555609	3.10619e-08	2.28307e-07	59.4203	58.5244
Myeloid Cells (Day 14)	Atox1	ova low	2.53517	0.40158	2.25177e+06	0.677849	1.66365e-65	3.3866e-63	95.5918	92.323
Myeloid Cells (Day 14)	Sub1	ova low	2.14936	0.398054	2.11629e+06	0.637065	1.13727e-39	7.98708e-38	91.0024	84.0479
Myeloid Cells (Day 14)	Rpl28	ova low	3.14329	0.375103	2.33817e+06	0.703857	1.81096e-85	8.77127e-83	97.2222	96.2114
Myeloid Cells (Day 14)	Rplp0	ova low	3.16488	0.365922	2.38947e+06	0.7193	1.31947e-98	1.02963e-95	97.2826	96.9093
Myeloid Cells (Day 14)	Rps11	ova low	3.64426	0.350409	2.3088e+06	0.695015	2.25091e-78	7.90408e-76	98.2488	97.6072
Myeloid Cells (Day 14)	Rps3	ova low	2.94175	0.348549	2.29855e+06	0.691931	5.63383e-76	1.68368e-73	97.192	95.6132
Myeloid Cells (Day 14)	Sec61b	ova low	1.77564	0.336242	2.10477e+06	0.633596	8.07096e-38	5.10652e-36	88.1039	81.3559
Myeloid Cells (Day 14)	Atpif1	ova low	1.53362	0.333963	2026376	0.609999	1.97927e-26	6.9502e-25	77.808	73.3799
Myeloid Cells (Day 14)	Taldo1	ova low	1.422	0.331141	2.04991e+06	0.617084	9.0229e-30	4.03617e-28	77.4758	70.2891
Myeloid Cells (Day 14)	Rps5	ova low	3.17922	0.328115	2.30463e+06	0.693761	2.14723e-77	7.01394e-75	97.0411	96.7099
Myeloid Cells (Day 14)	S100a6	ova low	2.2135	0.326635	1919232	0.577745	7.15102e-14	9.93504e-13	86.3829	79.1625
Myeloid Cells (Day 14)	Cycs	ova low	1.03839	0.325289	2.0148e+06	0.606514	5.76663e-26	2.0049e-24	64.0097	53.8385
Myeloid Cells (Day 14)	Rpl15	ova low	2.7298	0.322574	2209059	0.664991	1.25397e-56	1.87376e-54	96.0447	93.8185
Myeloid Cells (Day 14)	H2afy	ova low	1.30217	0.322553	2.05959e+06	0.619998	2.46147e-31	1.1922e-29	75.2114	66.8993
Myeloid Cells (Day 14)	Rps18	ova low	3.23607	0.320874	2.28539e+06	0.68797	6.00703e-73	1.65441e-70	96.9203	97.2084
Myeloid Cells (Day 14)	Rpl21	ova low	3.28626	0.318378	2.27202e+06	0.683944	6.19013e-70	1.47367e-67	97.7355	96.8096
Myeloid Cells (Day 14)	Uba52	ova low	1.70562	0.31774	2.07994e+06	0.626122	6.83148e-34	3.64848e-32	88.3454	80.658
Myeloid Cells (Day 14)	Rpl29	ova low	2.4435	0.315863	2.19562e+06	0.660947	5.61518e-54	7.37111e-52	95.1389	92.8215
Myeloid Cells (Day 14)	Napsa	ova low	1.15683	0.31514	1982981	0.596935	1.68153e-21	4.37384e-20	67.663	56.0319
Myeloid Cells (Day 14)	Lgals1	ova low	0.882536	0.313375	1945999	0.585803	1.90604e-18	3.85212e-17	54.0761	42.7717
Myeloid Cells (Day 14)	Rps7	ova low	3.16195	0.310666	2296701	0.691374	1.51518e-75	4.4338e-73	97.0411	96.4108
Myeloid Cells (Day 14)	Atp5g1	ova low	1.15994	0.308012	2.03188e+06	0.611655	1.35355e-27	5.2811e-26	71.8901	61.8146
Myeloid Cells (Day 14)	Rpl10a	ova low	2.63992	0.306109	2.14997e+06	0.647203	1.92686e-45	1.79236e-43	95.622	92.8215
Myeloid Cells (Day 14)	Eif5a	ova low	1.29419	0.306102	2008305	0.604559	2.85064e-24	8.91762e-23	73.8527	64.5065
Myeloid Cells (Day 14)	Rpl32	ova low	3.47713	0.301926	2222555	0.669054	2.34201e-59	4.0117e-57	97.343	96.7099
Myeloid Cells (Day 14)	Eef1b2	ova low	2.29656	0.301056	2.0598e+06	0.620059	8.19171e-31	3.84819e-29	92.5121	91.0269
Myeloid Cells (Day 14)	Nedd8	ova low	1.43291	0.298283	2077315	0.625333	1.19893e-33	6.3072e-32	82.2766	74.8754
Myeloid Cells (Day 14)	Ssr4	ova low	1.21796	0.29799	2.03935e+06	0.613903	1.90924e-28	8.02908e-27	74.6377	65.4038
Myeloid Cells (Day 14)	Psmb8	ova low	1.75261	0.29622	2001073	0.602382	6.43823e-23	1.82321e-21	86.4432	79.8604
Myeloid Cells (Day 14)	Ppib	ova low	1.27351	0.294911	2038220	0.613564	4.15818e-28	1.68317e-26	77.9891	68.4945
Myeloid Cells (Day 14)	Cox5b	ova low	1.56648	0.293816	2034804	0.612536	2.22223e-27	8.48193e-26	85.4771	76.4706
Myeloid Cells (Day 14)	S100a4	ova low	2.32381	0.291174	1976456	0.594971	3.68866e-20	8.56378e-19	74.3659	78.3649
Myeloid Cells (Day 14)	Rpl11	ova low	3.19078	0.286354	2262711	0.681142	7.07745e-68	1.60338e-65	97.5845	97.2084
Myeloid Cells (Day 14)	Ptms	ova low	1.28375	0.286282	1.96112e+06	0.590355	1.24806e-18	2.58941e-17	71.256	63.4098
Myeloid Cells (Day 14)	Snrpf	ova low	0.99039	0.28559	2020607	0.608262	1.50038e-26	5.32182e-25	65.9722	55.9322
Myeloid Cells (Day 14)	Naca	ova low	2.2258	0.285587	2133382	0.64221	1.54308e-42	1.21765e-40	93.5085	90.8275
Myeloid Cells (Day 14)	Emp3	ova low	0.967498	0.282723	1947205	0.586166	7.47333e-18	1.43207e-16	60.8394	48.3549
Myeloid Cells (Day 14)	Ndufb11	ova low	0.93797	0.280792	2.02402e+06	0.609289	4.05515e-27	1.5189e-25	65.2476	54.6361
Myeloid Cells (Day 14)	Rpl13	ova low	3.79972	0.280385	2316084	0.697209	4.18681e-80	1.54758e-77	98.128	98.4048
Myeloid Cells (Day 14)	Prdx1	ova low	1.57977	0.278509	2.00499e+06	0.603562	1.77889e-23	5.24921e-22	82.9106	76.67
Myeloid Cells (Day 14)	Clic1	ova low	1.45994	0.277312	2004980	0.603558	1.61447e-23	4.78415e-22	81.6123	73.3799
Myeloid Cells (Day 14)	Rpl6	ova low	2.79368	0.27429	2179215	0.656008	8.09525e-51	9.63609e-49	96.3768	95.2144
Myeloid Cells (Day 14)	Smdt1	ova low	1.27968	0.270955	2.02139e+06	0.608497	8.09833e-26	2.8017e-24	76.7814	70.5882
Myeloid Cells (Day 14)	Cd52	ova low	3.18891	0.268961	2.04333e+06	0.615101	1.91918e-28	8.04512e-27	97.3732	96.1117
Myeloid Cells (Day 14)	Ndufa13	ova low	1.34876	0.266753	2014894	0.606542	8.04476e-25	2.60962e-23	80.8273	72.7817
Myeloid Cells (Day 14)	Ptma	ova low	2.96281	0.265819	1.96418e+06	0.591274	1.75371e-18	3.56994e-17	96.8599	95.015
Myeloid Cells (Day 14)	Rps2	ova low	2.8807	0.264484	2137632	0.64349	2.90926e-43	2.41796e-41	96.407	95.3141
Myeloid Cells (Day 14)	Rps15a	ova low	3.50659	0.259177	2.21244e+06	0.666008	2.65823e-57	4.10302e-55	97.4336	97.2084
Myeloid Cells (Day 14)	Cox8a	ova low	2.08069	0.258681	2005375	0.603677	2.1397e-23	6.27437e-22	93.1763	88.2353
Myeloid Cells (Day 14)	Prdx5	ova low	0.95398	0.258423	1834498	0.552238	1.10482e-07	7.49313e-07	54.0157	48.4546
Myeloid Cells (Day 14)	Rpl18	ova low	3.22898	0.255032	2238099	0.673733	1.38519e-62	2.70227e-60	97.9167	97.4078
Myeloid Cells (Day 14)	Cox7b	ova low	1.40316	0.254369	2.00345e+06	0.603096	2.36428e-23	6.91848e-22	79.8007	74.9751
Myeloid Cells (Day 14)	Elob	ova low	1.4674	0.253392	1.98461e+06	0.597427	6.05941e-21	1.53352e-19	84.1787	76.3709
Myeloid Cells (Day 14)	Atp5h	ova low	1.83708	0.253318	2.04643e+06	0.616035	6.46807e-29	2.76141e-27	89.8853	85.8425

## Sheet: Endothelial_Stromal_Day_2
Sample	gene	group	avgExpr	logFC	statistic	auc	pval	padj	pct_in	pct_out
Endothelial/Stromal Cells (Day 2)	Ccl2	ova high	2.66065	1.45138	7926	0.726623	8.80349e-09	3.56354e-05	83.3333	51.4851
Endothelial/Stromal Cells (Day 2)	Vmp1	ova high	1.63344	1.00362	7588.5	0.695682	3.966e-07	0.000412889	71.2963	44.5545
Endothelial/Stromal Cells (Day 2)	S1pr1	ova high	2.2372	0.99413	8267	0.757884	1.03543e-10	1.50914e-06	95.3704	64.3564
Endothelial/Stromal Cells (Day 2)	Lyve1	ova high	1.99275	0.981588	7585	0.695361	4.58971e-07	0.000445967	74.0741	44.5545
Endothelial/Stromal Cells (Day 2)	Tnc	ova high	1.97246	0.964855	7723	0.708012	9.983e-08	0.000165271	77.7778	47.5248
Endothelial/Stromal Cells (Day 2)	Nts	ova high	2.08439	0.92939	7363	0.675009	7.56534e-06	0.00393778	75.9259	50.495
Endothelial/Stromal Cells (Day 2)	Grn	ova high	1.90571	0.878437	8061	0.738999	1.79892e-09	1.31096e-05	87.963	60.396
Endothelial/Stromal Cells (Day 2)	Ptp4a1	ova high	1.92617	0.866791	7861.5	0.72071	2.86318e-08	6.39279e-05	88.8889	61.3861
Endothelial/Stromal Cells (Day 2)	C3	ova high	1.34417	0.859467	7570	0.693986	1.13392e-07	0.000165271	62.037	26.7327
Endothelial/Stromal Cells (Day 2)	Egfl7	ova high	2.59911	0.849398	7510.5	0.688531	2.40606e-06	0.00140273	95.3704	71.2871
Endothelial/Stromal Cells (Day 2)	Ccnd1	ova high	1.92958	0.819932	7470	0.684818	2.7661e-06	0.00151876	83.3333	52.4752
Endothelial/Stromal Cells (Day 2)	Serpinb6b	ova high	1.43344	0.794636	7483	0.68601	1.34371e-06	0.000932602	68.5185	45.5446
Endothelial/Stromal Cells (Day 2)	Cd63	ova high	2.31911	0.765558	7533	0.690594	1.8274e-06	0.00111838	93.5185	69.3069
Endothelial/Stromal Cells (Day 2)	Cpe	ova high	1.2828	0.765383	7737.5	0.709342	3.0703e-08	6.39279e-05	71.2963	31.6832
Endothelial/Stromal Cells (Day 2)	H2-K1	ova high	4.01872	0.747034	7691	0.705079	3.06981e-07	0.000360906	100	91.0891
Endothelial/Stromal Cells (Day 2)	Hif1a	ova high	1.64093	0.744346	7703	0.706179	1.90536e-07	0.000252461	83.3333	58.4158
Endothelial/Stromal Cells (Day 2)	Ctla2a	ova high	1.67191	0.731798	7090	0.649982	8.85523e-05	0.0215108	67.5926	42.5743
Endothelial/Stromal Cells (Day 2)	Tmsb10	ova high	3.11818	0.729472	7080	0.649065	0.000194576	0.0368304	94.4444	76.2376
Endothelial/Stromal Cells (Day 2)	Odc1	ova high	1.82148	0.720791	7318.5	0.67093	1.5384e-05	0.00606004	84.2593	55.4455
Endothelial/Stromal Cells (Day 2)	Cd55	ova high	1.53001	0.718633	7534.5	0.690732	1.01109e-06	0.000818704	78.7037	45.5446
Endothelial/Stromal Cells (Day 2)	Procr	ova high	1.37061	0.713496	7396	0.678034	2.81348e-06	0.00151876	68.5185	37.6238
Endothelial/Stromal Cells (Day 2)	Itpripl2	ova high	1.12667	0.702454	7763	0.71168	2.84446e-08	6.39279e-05	68.5185	39.604
Endothelial/Stromal Cells (Day 2)	Lgmn	ova high	1.55847	0.695847	7367	0.675376	7.83503e-06	0.00393778	75.9259	54.4554
Endothelial/Stromal Cells (Day 2)	C2	ova high	1.08469	0.680711	7606	0.697286	1.13393e-07	0.000165271	64.8148	30.6931
Endothelial/Stromal Cells (Day 2)	mt-Co1	ova high	4.34377	0.678167	7175	0.657774	8.21053e-05	0.0206597	99.0741	90.099
Endothelial/Stromal Cells (Day 2)	Clic4	ova high	2.05668	0.664542	7218	0.661716	4.85384e-05	0.0141489	89.8148	62.3762
Endothelial/Stromal Cells (Day 2)	B2m	ova high	4.34936	0.656297	7568	0.693803	1.31537e-06	0.000932602	100	95.0495
Endothelial/Stromal Cells (Day 2)	Clu	ova high	1.42517	0.655219	6964.5	0.638476	0.000184461	0.0359515	60.1852	33.6634
Endothelial/Stromal Cells (Day 2)	Npc2	ova high	1.68099	0.649512	7229.5	0.66277	3.93023e-05	0.0124381	82.4074	59.4059
Endothelial/Stromal Cells (Day 2)	Rtn4	ova high	1.78101	0.61774	7384	0.676934	8.71657e-06	0.00397013	85.1852	66.3366
Endothelial/Stromal Cells (Day 2)	Hsp90aa1	ova high	2.0734	0.617526	7205	0.660524	5.77669e-05	0.0158859	90.7407	69.3069
Endothelial/Stromal Cells (Day 2)	Hnrnpa2b1	ova high	2.02818	0.609601	7597	0.696461	8.55037e-07	0.000733068	87.963	72.2772
Endothelial/Stromal Cells (Day 2)	Pcbp1	ova high	1.84211	0.608053	7529.5	0.690273	1.84159e-06	0.00111838	87.963	70.297
Endothelial/Stromal Cells (Day 2)	Pdlim1	ova high	1.90802	0.593905	7170.5	0.657362	7.66168e-05	0.0203035	86.1111	65.3465
Endothelial/Stromal Cells (Day 2)	Degs1	ova high	1.5953	0.574694	7281	0.667492	2.30139e-05	0.00838569	79.6296	61.3861
Endothelial/Stromal Cells (Day 2)	Eif3a	ova high	1.83282	0.572671	7345.5	0.673405	1.37102e-05	0.00555074	87.963	69.3069
Endothelial/Stromal Cells (Day 2)	Pabpc1	ova high	2.11012	0.570825	7173.5	0.657637	7.87051e-05	0.0204844	89.8148	71.2871
Endothelial/Stromal Cells (Day 2)	Tulp4	ova high	1.52456	0.56734	7223.5	0.66222	4.26098e-05	0.0129383	84.2593	59.4059
Endothelial/Stromal Cells (Day 2)	H2-Q6	ova high	1.98789	0.565001	7089	0.64989	0.000175195	0.0355559	91.6667	71.2871
Endothelial/Stromal Cells (Day 2)	Fam107b	ova high	1.00712	0.555341	7522	0.689586	5.31195e-07	0.000483885	68.5185	34.6535
Endothelial/Stromal Cells (Day 2)	Akap12	ova high	1.1886	0.533138	6980	0.639897	0.000232903	0.0419082	63.8889	42.5743
Endothelial/Stromal Cells (Day 2)	Sh3bp5	ova high	1.49013	0.532915	7298.5	0.669096	1.89657e-05	0.00708782	78.7037	61.3861
Endothelial/Stromal Cells (Day 2)	Lamp1	ova high	1.68856	0.524582	7116	0.652365	0.000125022	0.0284717	85.1852	62.3762
Endothelial/Stromal Cells (Day 2)	Slc38a4	ova high	1.07253	0.52294	7250.5	0.664696	1.62168e-05	0.00622	67.5926	41.5842
Endothelial/Stromal Cells (Day 2)	Hspa9	ova high	1.37416	0.51334	7199	0.659974	5.15175e-05	0.0147229	81.4815	57.4257
Endothelial/Stromal Cells (Day 2)	Cfap43	ova high	0.741521	0.505233	7434	0.681518	3.21906e-07	0.000360906	55.5556	23.7624
Endothelial/Stromal Cells (Day 2)	Cebpb	ova high	1.28389	0.502992	7020.5	0.64361	0.000213856	0.0398354	71.2963	48.5149
Endothelial/Stromal Cells (Day 2)	Ppp2ca	ova high	1.44262	0.48807	7040.5	0.645444	0.000239016	0.0424836	82.4074	59.4059
Endothelial/Stromal Cells (Day 2)	Gns	ova high	1.03504	0.482134	7320	0.671067	9.05375e-06	0.00399874	70.3704	44.5545
Endothelial/Stromal Cells (Day 2)	Rab1a	ova high	1.1134	0.479319	7343.5	0.673221	8.58222e-06	0.00397013	73.1481	49.505
Endothelial/Stromal Cells (Day 2)	Tnfrsf12a	ova high	1.05053	0.478027	7135	0.654107	4.72964e-05	0.0140683	66.6667	37.6238
Endothelial/Stromal Cells (Day 2)	Il2rg	ova high	1.14457	0.4757	7156	0.656032	5.76121e-05	0.0158859	72.2222	47.5248
Endothelial/Stromal Cells (Day 2)	Plekho2	ova high	1.09064	0.46905	7235.5	0.66332	2.49249e-05	0.00886051	71.2963	47.5248
Endothelial/Stromal Cells (Day 2)	Rars	ova high	0.830789	0.465912	7012.5	0.642877	8.22136e-05	0.0206597	54.6296	31.6832
Endothelial/Stromal Cells (Day 2)	Rpn1	ova high	0.918264	0.46385	7262	0.66575	1.20834e-05	0.00517987	63.8889	40.5941
Endothelial/Stromal Cells (Day 2)	Caprin1	ova high	1.2564	0.459345	7078	0.648882	0.000150095	0.0321721	75.9259	55.4455
Endothelial/Stromal Cells (Day 2)	Rnf141	ova high	0.709374	0.456233	7132.5	0.653878	1.29554e-05	0.00539499	52.7778	24.7525
Endothelial/Stromal Cells (Day 2)	Dync1h1	ova high	1.29877	0.447262	7084.5	0.649477	0.0001501	0.0321721	78.7037	57.4257
Endothelial/Stromal Cells (Day 2)	Lasp1	ova high	1.11707	0.441941	7041.5	0.645535	0.000184999	0.0359515	73.1481	49.505
Endothelial/Stromal Cells (Day 2)	Nus1	ova high	0.861555	0.439599	6983	0.640172	0.000175645	0.0355559	59.2593	38.6139
Endothelial/Stromal Cells (Day 2)	Trip12	ova high	0.995783	0.438472	7192	0.659333	3.12082e-05	0.0105781	68.5185	41.5842
Endothelial/Stromal Cells (Day 2)	Dazap2	ova high	1.18654	0.428121	6987.5	0.640585	0.000327249	0.0498611	75	52.4752
Endothelial/Stromal Cells (Day 2)	U2af2	ova high	0.829259	0.413983	7142.5	0.654795	3.42517e-05	0.0113459	62.037	35.6436
Endothelial/Stromal Cells (Day 2)	Cers2	ova high	0.813614	0.407356	7070	0.648148	7.59229e-05	0.0203035	62.963	35.6436
Endothelial/Stromal Cells (Day 2)	Hmgn1	ova high	1.12706	0.405659	6981	0.639989	0.000312896	0.0495853	68.5185	52.4752
Endothelial/Stromal Cells (Day 2)	Atp6v1d	ova high	0.690682	0.386252	7060.5	0.647277	4.0109e-05	0.0124381	54.6296	27.7228
Endothelial/Stromal Cells (Day 2)	Hnrnpm	ova high	1.09383	0.385784	6987	0.640539	0.000319796	0.0495853	72.2222	53.4653
Endothelial/Stromal Cells (Day 2)	Eif4b	ova high	0.881487	0.373687	6984	0.640264	0.000218651	0.0398354	62.963	42.5743
Endothelial/Stromal Cells (Day 2)	Trim25	ova high	0.792903	0.372562	6922	0.63458	0.000306538	0.0495853	59.2593	37.6238
Endothelial/Stromal Cells (Day 2)	Prkcsh	ova high	0.699727	0.369063	6891	0.631738	0.000249927	0.0438878	52.7778	30.6931
Endothelial/Stromal Cells (Day 2)	Psmc5	ova high	0.624497	0.354226	6967	0.638706	9.94285e-05	0.0237569	51.8519	28.7129
Endothelial/Stromal Cells (Day 2)	Cdkn1a	ova high	0.769425	0.348537	6900.5	0.632609	0.000217562	0.0398354	54.6296	27.7228
Endothelial/Stromal Cells (Day 2)	Mta2	ova high	0.597261	0.31276	7065	0.64769	3.81581e-05	0.012359	55.5556	26.7327
Endothelial/Stromal Cells (Day 2)	Cap1	ova high	0.55789	0.287664	6872	0.629996	0.000276872	0.0463841	51.8519	29.703
Endothelial/Stromal Cells (Day 2)	Malat1	ova low	4.38462	0.738499	7399	0.678309	8.3298e-06	0.00397013	84.1584	87.963
Endothelial/Stromal Cells (Day 2)	Crip1	ova low	0.999624	0.644642	7079	0.648973	3.08629e-05	0.0105781	52.4752	30.5556
Endothelial/Stromal Cells (Day 2)	Ubb	ova low	2.51059	0.605581	7958.5	0.729602	9.77987e-09	3.56354e-05	91.0891	87.963

## Sheet: Endothelial_Stromal_Day_14
Sample	gene	group	avgExpr	logFC	statistic	auc	pval	padj	pct_in	pct_out
Endothelial/Stromal Cells (Day 14)	Mmrn1	ova high	2.522	1.01128	2015256	0.724204	1.02649e-106	8.39205e-103	88.6491	60.3664
Endothelial/Stromal Cells (Day 14)	Tgfa	ova high	1.5276	0.966915	2062187	0.74107	2.71085e-130	4.43251e-126	72.5507	35.1374
Endothelial/Stromal Cells (Day 14)	Nfat5	ova high	2.25284	0.790656	1966517	0.70669	1.05713e-90	2.88086e-87	86.8796	71.6903
Endothelial/Stromal Cells (Day 14)	Nudt4	ova high	2.00316	0.783116	1979626	0.7114	3.42041e-95	1.39818e-91	84.5058	66.0283
Endothelial/Stromal Cells (Day 14)	Thbs1	ova high	1.66603	0.778553	1.85641e+06	0.667122	2.5204e-63	1.47183e-60	68.4937	45.6286
Endothelial/Stromal Cells (Day 14)	Prss23	ova high	1.52692	0.773171	1.88854e+06	0.678667	7.80589e-73	7.50788e-70	66.8537	43.0475
Endothelial/Stromal Cells (Day 14)	Fn1	ova high	2.35013	0.767075	1813841	0.651824	5.66445e-50	1.85239e-47	87.268	61.5321
Endothelial/Stromal Cells (Day 14)	Prox1	ova high	2.18702	0.736089	1851478	0.665349	8.8246e-59	3.89976e-56	89.6418	63.3639
Endothelial/Stromal Cells (Day 14)	Sema3d	ova high	1.62888	0.733785	1941861	0.697829	3.4392e-85	6.24827e-82	79.5857	49.1257
Endothelial/Stromal Cells (Day 14)	Sgk1	ova high	1.80633	0.731097	1899230	0.682509	2.60413e-72	2.36556e-69	78.5498	58.4513
Endothelial/Stromal Cells (Day 14)	Fxyd6	ova high	1.33191	0.690074	1.94542e+06	0.699108	5.60441e-89	1.30911e-85	71.2559	41.1324
Endothelial/Stromal Cells (Day 14)	Clca3a1	ova high	1.38365	0.673395	1.90985e+06	0.686326	1.51243e-77	2.24816e-74	73.5002	41.8818
Endothelial/Stromal Cells (Day 14)	Cldn5	ova high	2.10711	0.646541	1.83208e+06	0.658379	4.13703e-54	1.57313e-51	87.4838	66.0283
Endothelial/Stromal Cells (Day 14)	Tnc	ova high	1.80374	0.626883	1800731	0.647113	9.50733e-48	2.68025e-45	78.7225	54.8709
Endothelial/Stromal Cells (Day 14)	Klhl4	ova high	1.26632	0.624572	1891576	0.679759	1.3972e-73	1.51525e-70	68.2348	41.2989
Endothelial/Stromal Cells (Day 14)	Fstl1	ova high	1.27939	0.592274	1887248	0.678203	1.55067e-71	1.20738e-68	70.0906	44.3797
Endothelial/Stromal Cells (Day 14)	Klf4	ova high	2.20078	0.590013	1793005	0.644336	3.70865e-45	9.1879e-43	86.5775	73.0225
Endothelial/Stromal Cells (Day 14)	Nfatc1	ova high	1.10149	0.584298	1866500	0.670747	4.98996e-69	3.54743e-66	62.2788	35.5537
Endothelial/Stromal Cells (Day 14)	Cd9	ova high	1.56803	0.576173	1853213	0.665973	2.26587e-60	1.08968e-57	76.1761	58.2015
Endothelial/Stromal Cells (Day 14)	Ctsd	ova high	2.13819	0.569799	1827038	0.656566	9.74068e-53	3.38872e-50	88.3038	75.0208
Endothelial/Stromal Cells (Day 14)	Psap	ova high	2.30295	0.542989	1876909	0.674488	7.31979e-65	4.43281e-62	93.7419	81.7652
Endothelial/Stromal Cells (Day 14)	Klf6	ova high	1.88956	0.52914	1783790	0.641025	1.88134e-43	4.39453e-41	81.7005	67.9434
Endothelial/Stromal Cells (Day 14)	Wnk1	ova high	1.89442	0.516884	1.84019e+06	0.661293	5.35277e-56	2.13471e-53	85.4122	72.6062
Endothelial/Stromal Cells (Day 14)	Marcks	ova high	3.0162	0.516842	1749698	0.628773	4.22528e-36	6.5177e-34	97.4968	88.7594
Endothelial/Stromal Cells (Day 14)	Scn3a	ova high	1.03572	0.51469	1.75617e+06	0.631099	2.83623e-44	6.81988e-42	53.0427	30.6411
Endothelial/Stromal Cells (Day 14)	Nts	ova high	1.68808	0.508824	1.68649e+06	0.606057	2.88777e-26	2.55232e-24	69.0117	51.4571
Endothelial/Stromal Cells (Day 14)	Cald1	ova high	1.49178	0.500279	1779560	0.639504	2.31669e-43	5.26114e-41	75.6582	54.7044
Endothelial/Stromal Cells (Day 14)	Klf2	ova high	1.92625	0.485718	1711564	0.615069	1.47592e-29	1.5773e-27	80.3194	67.0275
Endothelial/Stromal Cells (Day 14)	Cp	ova high	1.13486	0.482755	1.78174e+06	0.640287	2.69976e-46	7.3573e-44	64.1778	40.383
Endothelial/Stromal Cells (Day 14)	Aplp2	ova high	2.7765	0.474178	1828947	0.657252	5.60057e-53	2.035e-50	96.1588	89.0092
Endothelial/Stromal Cells (Day 14)	Stab1	ova high	1.72088	0.465898	1.7329e+06	0.622737	2.2414e-33	3.02885e-31	82.6068	63.6969
Endothelial/Stromal Cells (Day 14)	Cyr61	ova high	1.86644	0.465796	1.68884e+06	0.606904	7.84407e-26	6.7151e-24	78.4204	64.7794
Endothelial/Stromal Cells (Day 14)	Tbc1d4	ova high	1.29703	0.46541	1.77409e+06	0.63754	7.28608e-43	1.63198e-40	71.0833	50.1249
Endothelial/Stromal Cells (Day 14)	Arl4a	ova high	1.14965	0.449594	1.75664e+06	0.631269	2.27043e-40	4.47275e-38	64.221	45.0458
Endothelial/Stromal Cells (Day 14)	Maff	ova high	0.919911	0.44845	1.76914e+06	0.635761	5.00354e-46	1.3412e-43	55.8481	33.8884
Endothelial/Stromal Cells (Day 14)	Wsb1	ova high	1.75288	0.445053	1.76528e+06	0.634373	1.81546e-39	3.20923e-37	84.5058	70.2748
Endothelial/Stromal Cells (Day 14)	Tulp4	ova high	1.08921	0.435416	1775736	0.63813	2.24826e-44	5.48676e-42	64.9115	45.3789
Endothelial/Stromal Cells (Day 14)	Cavin2	ova high	1.77044	0.434699	1729336	0.621456	1.05239e-32	1.36568e-30	80.6647	68.1932
Endothelial/Stromal Cells (Day 14)	Dusp2	ova high	0.882872	0.423695	1740296	0.625395	1.59258e-40	3.21485e-38	52.9132	31.8068
Endothelial/Stromal Cells (Day 14)	Sh3bp5	ova high	1.24198	0.421878	1746811	0.627736	2.84786e-37	4.65653e-35	69.2274	52.4563
Endothelial/Stromal Cells (Day 14)	Dab2	ova high	1.27756	0.412371	1722805	0.619109	1.16653e-32	1.50188e-30	68.3643	53.4555
Endothelial/Stromal Cells (Day 14)	Ctnnb1	ova high	1.78548	0.404601	1756007	0.63104	1.38304e-37	2.29612e-35	84.3332	72.856
Endothelial/Stromal Cells (Day 14)	Anxa2	ova high	1.32635	0.400492	1727121	0.62066	2.72567e-33	3.65307e-31	69.0548	56.2032
Endothelial/Stromal Cells (Day 14)	S100a6	ova high	1.25619	0.398624	1.67121e+06	0.600567	1.00216e-24	8.03253e-23	60.5524	45.1291
Endothelial/Stromal Cells (Day 14)	Lhfp	ova high	0.813555	0.397318	1.73563e+06	0.623717	2.01952e-40	4.02697e-38	51.1006	28.8926
Endothelial/Stromal Cells (Day 14)	Slc38a4	ova high	0.947981	0.395874	1.73431e+06	0.623244	1.39023e-37	2.29612e-35	57.8766	35.97
Endothelial/Stromal Cells (Day 14)	Gpx1	ova high	1.77174	0.391345	1.73837e+06	0.624703	3.11389e-34	4.42741e-32	83.4268	72.1066
Endothelial/Stromal Cells (Day 14)	Rbms1	ova high	1.78638	0.389297	1738456	0.624733	3.49896e-34	4.88988e-32	85.2395	73.7719
Endothelial/Stromal Cells (Day 14)	F11r	ova high	1.5518	0.388212	1.73041e+06	0.621844	6.50613e-33	8.57917e-31	80.9668	67.0275
Endothelial/Stromal Cells (Day 14)	Marcksl1	ova high	1.79466	0.382755	1680835	0.604027	2.48763e-24	1.95554e-22	84.1606	70.2748
Endothelial/Stromal Cells (Day 14)	Ppp3ca	ova high	1.59125	0.379115	1.73661e+06	0.62407	4.58893e-34	6.35878e-32	79.3699	70.1082
Endothelial/Stromal Cells (Day 14)	Sox4	ova high	1.24934	0.373842	1674931	0.601905	1.32245e-24	1.04968e-22	65.2568	52.2898
Endothelial/Stromal Cells (Day 14)	Esyt2	ova high	1.18818	0.371642	1710587	0.614718	1.80233e-30	2.07534e-28	68.1053	52.7061
Endothelial/Stromal Cells (Day 14)	Ifi27l2a	ova high	2.30884	0.369093	1.54838e+06	0.556428	3.35261e-08	6.25782e-07	84.7648	68.2764
Endothelial/Stromal Cells (Day 14)	Degs1	ova high	1.47768	0.3683	1708897	0.614111	3.03191e-29	3.21914e-27	77.6867	64.1132
Endothelial/Stromal Cells (Day 14)	Apold1	ova high	1.39429	0.36485	1.66093e+06	0.596872	4.93044e-22	3.40158e-20	69.1843	56.2864
Endothelial/Stromal Cells (Day 14)	Crim1	ova high	1.45849	0.364165	1685587	0.605734	1.63573e-25	1.38579e-23	74.1044	62.5312
Endothelial/Stromal Cells (Day 14)	Btg1	ova high	1.95539	0.358532	1714702	0.616197	8.52635e-30	9.35667e-28	87.7859	79.9334
Endothelial/Stromal Cells (Day 14)	Cd63	ova high	1.63592	0.355651	1669489	0.599949	1.20687e-22	8.69319e-21	82.3047	67.9434
Endothelial/Stromal Cells (Day 14)	Gm42418	ova high	3.99071	0.35132	1573504	0.565456	1.8142e-10	4.5497e-09	97.7989	96.0033
Endothelial/Stromal Cells (Day 14)	Bhlhe40	ova high	1.09403	0.348192	1.68069e+06	0.603975	5.28513e-26	4.57234e-24	62.1925	47.96
Endothelial/Stromal Cells (Day 14)	S100a16	ova high	1.3444	0.348167	1696334	0.609596	2.19534e-27	2.08697e-25	73.3707	60.1166
Endothelial/Stromal Cells (Day 14)	Nr2f2	ova high	1.72684	0.347353	1643045	0.590446	8.63097e-19	4.52323e-17	83.9448	69.5254
Endothelial/Stromal Cells (Day 14)	Map3k1	ova high	0.777124	0.347267	1710267	0.614603	1.63473e-34	2.36543e-32	51.4027	31.557
Endothelial/Stromal Cells (Day 14)	Ifrd1	ova high	1.33213	0.342945	1660131	0.596586	8.1343e-22	5.47341e-20	70.9107	56.7027
Endothelial/Stromal Cells (Day 14)	Dock9	ova high	1.39008	0.33954	1.6893e+06	0.60707	4.74635e-26	4.12806e-24	75.3992	63.1973
Endothelial/Stromal Cells (Day 14)	Pdpn	ova high	1.22883	0.338837	1.6556e+06	0.594958	1.7537e-21	1.1516e-19	67.8895	50.1249
Endothelial/Stromal Cells (Day 14)	Cavin1	ova high	1.20182	0.335127	1.68046e+06	0.603891	2.76698e-25	2.29659e-23	67.199	54.5379
Endothelial/Stromal Cells (Day 14)	Sptssa	ova high	0.953783	0.328374	1.68439e+06	0.605302	3.25736e-27	3.07867e-25	59.2577	43.214
Endothelial/Stromal Cells (Day 14)	Celf1	ova high	1.03956	0.32504	1683693	0.605054	2.31717e-26	2.05913e-24	63.0988	49.2923
Endothelial/Stromal Cells (Day 14)	Fth1	ova high	3.44616	0.324954	1765706	0.634526	3.10014e-39	5.33584e-37	98.4894	96.836
Endothelial/Stromal Cells (Day 14)	Tmsb10	ova high	3.35174	0.322684	1686592	0.606095	4.88178e-25	3.97124e-23	97.7989	94.005
Endothelial/Stromal Cells (Day 14)	S100a11	ova high	2.21584	0.322447	1.64244e+06	0.590229	1.37896e-18	7.13524e-17	89.8144	81.5154
Endothelial/Stromal Cells (Day 14)	mt-Co1	ova high	4.37185	0.322234	1.7802e+06	0.639734	3.40088e-42	7.31682e-40	98.7915	96.0866
Endothelial/Stromal Cells (Day 14)	Stab2	ova high	1.16022	0.320461	1.6412e+06	0.589783	1.29452e-19	7.24888e-18	65.3	47.2107
Endothelial/Stromal Cells (Day 14)	Lamp2	ova high	1.63244	0.318622	1648135	0.592275	1.64841e-19	9.13669e-18	82.65	70.1915
Endothelial/Stromal Cells (Day 14)	Plk2	ova high	1.38277	0.311738	1.63319e+06	0.586904	6.80243e-18	3.31031e-16	71.2128	59.617
Endothelial/Stromal Cells (Day 14)	Wwtr1	ova high	1.16162	0.311151	1668607	0.599632	2.01307e-23	1.52388e-21	66.4653	54.7877
Endothelial/Stromal Cells (Day 14)	Pbx1	ova high	0.867815	0.308486	1658088	0.595852	1.25512e-23	9.63497e-22	53.8196	40.1332
Endothelial/Stromal Cells (Day 14)	Ednrb	ova high	0.989633	0.308226	1.62327e+06	0.583338	2.59368e-18	1.3049e-16	54.0354	38.4679
Endothelial/Stromal Cells (Day 14)	Hnrnph1	ova high	1.84671	0.308151	1671595	0.600706	8.34551e-23	6.03794e-21	86.7501	78.6844
Endothelial/Stromal Cells (Day 14)	Ddx3x	ova high	2.15224	0.30772	1.68897e+06	0.606949	1.9067e-25	1.60703e-23	91.2387	84.9292
Endothelial/Stromal Cells (Day 14)	Elk3	ova high	1.50736	0.307696	1673046	0.601228	2.56908e-23	1.91813e-21	76.953	68.443
Endothelial/Stromal Cells (Day 14)	Slc38a2	ova high	1.50237	0.306692	1.65148e+06	0.593477	4.29427e-20	2.49877e-18	78.3341	67.6936
Endothelial/Stromal Cells (Day 14)	Ppp1r2	ova high	1.27694	0.303482	1659637	0.596409	1.08848e-21	7.26437e-20	70.738	59.2007
Endothelial/Stromal Cells (Day 14)	Fosb	ova high	2.72968	0.303233	1.5629e+06	0.561646	1.86623e-09	4.15732e-08	91.5839	84.0966
Endothelial/Stromal Cells (Day 14)	Hnrnpk	ova high	2.10459	0.301212	1681662	0.604324	2.72396e-24	2.13107e-22	91.7134	83.9301
Endothelial/Stromal Cells (Day 14)	Galnt1	ova high	1.30238	0.298989	1.64761e+06	0.592086	6.47804e-20	3.72966e-18	70.7812	59.7002
Endothelial/Stromal Cells (Day 14)	Tbx1	ova high	0.871799	0.296996	1659257	0.596272	1.22034e-23	9.41214e-22	56.3228	38.0516
Endothelial/Stromal Cells (Day 14)	Pard6g	ova high	0.823793	0.294561	1.64712e+06	0.591912	1.78706e-22	1.26494e-20	51.489	35.4704
Endothelial/Stromal Cells (Day 14)	Thy1	ova high	1.09207	0.294015	1631834	0.586418	1.7768e-18	9.07887e-17	62.1493	47.4604
Endothelial/Stromal Cells (Day 14)	Dennd4a	ova high	0.834905	0.293989	1645332	0.591268	7.29163e-22	4.94711e-20	52.7838	37.552
Endothelial/Stromal Cells (Day 14)	Hnrnpf	ova high	1.65217	0.292288	1673230	0.601294	3.91918e-23	2.8866e-21	82.9089	74.8543
Endothelial/Stromal Cells (Day 14)	Junb	ova high	2.33202	0.292042	1574058	0.565655	1.51649e-10	3.86233e-09	89.0375	81.2656
Endothelial/Stromal Cells (Day 14)	Tgm2	ova high	1.08172	0.289393	1.65194e+06	0.593641	4.27452e-21	2.66766e-19	64.3936	51.8734
Endothelial/Stromal Cells (Day 14)	Mcl1	ova high	1.62528	0.288046	1.64766e+06	0.592105	1.82059e-19	1.00569e-17	80.4057	71.94
Endothelial/Stromal Cells (Day 14)	Jund	ova high	2.11912	0.285937	1.62277e+06	0.583161	4.95094e-16	2.11365e-14	88.0017	81.3489
Endothelial/Stromal Cells (Day 14)	Grn	ova high	1.16236	0.285736	1.63792e+06	0.588606	8.77994e-19	4.58661e-17	67.199	56.2864
Endothelial/Stromal Cells (Day 14)	Ptp4a1	ova high	1.05372	0.28516	1645039	0.591163	3.3694e-20	1.97466e-18	63.2715	50.3747
Endothelial/Stromal Cells (Day 14)	Rock2	ova high	1.29526	0.284304	1641785	0.589994	5.00096e-19	2.681e-17	71.5149	61.5321
Endothelial/Stromal Cells (Day 14)	Hspa9	ova high	0.858306	0.281727	1.64751e+06	0.592051	1.09437e-21	7.27398e-20	55.4165	40.8826
Endothelial/Stromal Cells (Day 14)	Eif4g2	ova high	2.16393	0.279293	1699740	0.61082	3.42454e-27	3.21808e-25	91.7134	87.0941
Endothelial/Stromal Cells (Day 14)	H2-Q6	ova high	1.69004	0.27846	1634962	0.587542	1.10907e-17	5.27161e-16	82.9521	74.2714
Endothelial/Stromal Cells (Day 14)	Sypl	ova high	1.43028	0.277575	1653267	0.59412	2.33257e-20	1.39196e-18	77.8593	67.8601
Endothelial/Stromal Cells (Day 14)	Dazap2	ova high	1.41707	0.277112	1644255	0.590881	4.19811e-19	2.258e-17	77.4709	67.3605
Endothelial/Stromal Cells (Day 14)	Adgrf5	ova high	1.18175	0.275559	1.62706e+06	0.584702	2.10608e-17	9.92406e-16	65.7747	54.6211
Endothelial/Stromal Cells (Day 14)	Rhoa	ova high	1.8011	0.274512	1.64842e+06	0.592377	1.90043e-19	1.04626e-17	86.1459	78.4346
Endothelial/Stromal Cells (Day 14)	BC005537	ova high	1.63137	0.274419	1.65355e+06	0.594221	3.00191e-20	1.77199e-18	81.9163	74.438
Endothelial/Stromal Cells (Day 14)	Rab11a	ova high	1.74511	0.271859	1.63859e+06	0.588844	3.92068e-18	1.95347e-16	84.6353	76.1032
Endothelial/Stromal Cells (Day 14)	Cpe	ova high	1.00642	0.271654	1.59993e+06	0.574951	7.67266e-15	3.01576e-13	56.0639	41.2157
Endothelial/Stromal Cells (Day 14)	Tc2n	ova high	0.87727	0.269663	1617625	0.581311	1.56414e-17	7.41311e-16	53.3448	39.3006
Endothelial/Stromal Cells (Day 14)	Pdcd6ip	ova high	1.0298	0.269368	1639772	0.58927	2.14346e-19	1.17217e-17	63.142	51.7902
Endothelial/Stromal Cells (Day 14)	Mtdh	ova high	1.15353	0.267882	1637766	0.588549	1.14329e-18	5.93457e-17	68.3643	57.9517
Endothelial/Stromal Cells (Day 14)	Gls	ova high	1.74228	0.267756	1628149	0.585093	9.06759e-17	4.07319e-15	83.9448	76.1865
Endothelial/Stromal Cells (Day 14)	Cd55	ova high	1.62056	0.267433	1.56353e+06	0.56187	1.11976e-09	2.5679e-08	76.9098	63.6969
Endothelial/Stromal Cells (Day 14)	Selenop	ova high	2.42887	0.265797	1578213	0.567148	5.85164e-11	1.58149e-09	88.9512	84.6794
Endothelial/Stromal Cells (Day 14)	Reep3	ova high	1.32649	0.264101	1645592	0.591362	2.00653e-19	1.10096e-17	73.6729	65.1957
Endothelial/Stromal Cells (Day 14)	Gna13	ova high	0.988017	0.263605	1623248	0.583332	2.37974e-17	1.11175e-15	60.5956	48.6261
Endothelial/Stromal Cells (Day 14)	Calm1	ova high	2.55302	0.263092	1693093	0.608432	4.31367e-26	3.77181e-24	92.5334	90.841
Endothelial/Stromal Cells (Day 14)	Slco3a1	ova high	0.96987	0.262341	1622532	0.583075	2.1532e-17	1.0117e-15	59.3008	47.0441
Endothelial/Stromal Cells (Day 14)	App	ova high	2.21206	0.261561	1.65697e+06	0.595451	1.36728e-20	8.24959e-19	91.8429	86.3447
Endothelial/Stromal Cells (Day 14)	Lmna	ova high	1.16307	0.258482	1590717	0.571642	4.61501e-13	1.50619e-11	62.7536	51.2073
Endothelial/Stromal Cells (Day 14)	Vim	ova high	2.04599	0.258136	1597965	0.574246	4.21077e-13	1.38254e-11	85.628	79.6003
Endothelial/Stromal Cells (Day 14)	Ahnak	ova high	1.51834	0.255457	1.60823e+06	0.577935	1.80011e-14	6.76634e-13	76.3487	67.7769
Endothelial/Stromal Cells (Day 14)	S100a10	ova high	1.5725	0.252241	1588629	0.570891	2.85998e-12	8.69209e-11	74.8382	65.945
Endothelial/Stromal Cells (Day 14)	Sqstm1	ova high	0.929551	0.251821	1.61424e+06	0.580095	1.82882e-16	8.06013e-15	57.2723	45.6286
Endothelial/Stromal Cells (Day 14)	Hipk1	ova high	0.991431	0.251201	1.618e+06	0.581445	1.61979e-16	7.15814e-15	61.8472	50.2914
Endothelial/Stromal Cells (Day 14)	Sat1	ova high	0.954118	0.251089	1.61044e+06	0.57873	4.62846e-16	1.98967e-14	56.6681	44.0466
Endothelial/Stromal Cells (Day 14)	Ctla2a	ova low	1.30085	0.733504	1.76576e+06	0.634546	2.23456e-48	6.64314e-46	54.0383	35.6495
Endothelial/Stromal Cells (Day 14)	Igfbp7	ova low	2.59725	0.61883	1.90032e+06	0.682902	3.03129e-71	2.25294e-68	87.6769	83.5563
Endothelial/Stromal Cells (Day 14)	Sparc	ova low	1.77268	0.5982	1.82908e+06	0.657299	9.56488e-55	3.7237e-52	77.9351	62.7104
Endothelial/Stromal Cells (Day 14)	Enpp2	ova low	1.0248	0.541192	1.726e+06	0.620255	6.11565e-41	1.24996e-38	50.458	31.8947
Endothelial/Stromal Cells (Day 14)	Malat1	ova low	4.96661	0.446913	1938503	0.696622	9.02635e-82	1.4759e-78	95.254	98.7915
Endothelial/Stromal Cells (Day 14)	Col4a2	ova low	1.80683	0.341885	1673930	0.601545	2.22894e-23	1.67951e-21	81.0158	73.1549
Endothelial/Stromal Cells (Day 14)	Rpl21	ova low	2.53363	0.31237	1771141	0.636479	2.37005e-40	4.61341e-38	93.5887	91.1092
Endothelial/Stromal Cells (Day 14)	Eng	ova low	1.02603	0.311713	1647731	0.59213	1.88104e-21	1.22537e-19	59.617	48.2521
Endothelial/Stromal Cells (Day 14)	Tmsb4x	ova low	3.73275	0.29793	1.66341e+06	0.597765	1.67199e-21	1.10237e-19	97.7519	97.0652
Endothelial/Stromal Cells (Day 14)	Raph1	ova low	0.926744	0.296672	1.63948e+06	0.589167	5.81023e-21	3.57154e-19	55.5371	43.2887
Endothelial/Stromal Cells (Day 14)	Atrx	ova low	1.49564	0.295889	1665454	0.598499	2.87636e-22	2.00989e-20	76.1032	69.5296
Endothelial/Stromal Cells (Day 14)	Mef2c	ova low	0.873919	0.272928	1.62413e+06	0.583648	5.85555e-19	3.12889e-17	54.2881	41.1308
Endothelial/Stromal Cells (Day 14)	Rrbp1	ova low	1.31302	0.263622	1.63343e+06	0.58699	5.33886e-18	2.61365e-16	70.6911	63.5304
Endothelial/Stromal Cells (Day 14)	Cyba	ova low	1.15847	0.25221	1605278	0.576874	7.99005e-15	3.12549e-13	64.6128	55.5891

## Sheet: Fibroblast_Stromal_Day_2
Sample	gene	group	avgExpr	logFC	statistic	auc	pval	padj	pct_in	pct_out
Fibroblast/Stromal Cells (Day 2)	Dync1h1	ova high	1.30295	0.390196	6738	0.699834	5.75853e-06	0.0279769	93.1034	81.9277

## Sheet: Fibroblast_Stromal_Day_14
Sample	gene	group	avgExpr	logFC	statistic	auc	pval	padj	pct_in	pct_out
Fibroblast/Stromal Cells (Day 14)	Mt1	ova high	1.70782	0.960972	235336	0.695971	1.56116e-26	6.07774e-24	73.5849	47.4922
Fibroblast/Stromal Cells (Day 14)	Ifi27l2a	ova high	2.26587	0.925958	227992	0.674255	9.41855e-20	1.75003e-17	80.7547	64.8119
Fibroblast/Stromal Cells (Day 14)	Apoe	ova high	2.02705	0.891719	219376	0.648773	1.06596e-16	1.38329e-14	69.0566	41.6928
Fibroblast/Stromal Cells (Day 14)	Mt2	ova high	1.19815	0.749229	227814	0.673728	2.21423e-24	7.87064e-22	58.4906	34.0909
Fibroblast/Stromal Cells (Day 14)	Mgst1	ova high	1.46494	0.743366	228502	0.675763	5.85121e-21	1.27564e-18	74.3396	53.605
Fibroblast/Stromal Cells (Day 14)	Scd1	ova high	1.19012	0.698295	200770	0.59375	1.14189e-07	3.8182e-06	53.5849	41.7712
Fibroblast/Stromal Cells (Day 14)	Rarres2	ova high	1.75653	0.670424	226084	0.668611	2.31564e-18	3.74881e-16	83.3962	70.2194
Fibroblast/Stromal Cells (Day 14)	C3	ova high	3.23319	0.587531	211760	0.626248	8.84657e-11	5.3974e-09	94.717	83.9342
Fibroblast/Stromal Cells (Day 14)	Dbi	ova high	1.84624	0.582762	203796	0.602697	1.21131e-07	4.02563e-06	84.5283	78.1348
Fibroblast/Stromal Cells (Day 14)	Btg1	ova high	1.68174	0.5807	230766	0.682455	3.40409e-21	7.83947e-19	85.283	70.8464
Fibroblast/Stromal Cells (Day 14)	Fth1	ova high	3.63886	0.569833	232816	0.688521	4.01779e-22	1.11347e-19	99.6226	97.1787
Fibroblast/Stromal Cells (Day 14)	Igfbp4	ova high	1.17673	0.555772	220678	0.652625	4.63036e-18	7.14255e-16	64.9057	38.7147
Fibroblast/Stromal Cells (Day 14)	Cavin1	ova high	1.49543	0.547631	228840	0.676763	3.19663e-20	6.61622e-18	81.1321	65.9091
Fibroblast/Stromal Cells (Day 14)	Glul	ova high	0.962511	0.539953	217692	0.643791	6.15883e-17	8.25435e-15	56.6038	35.8934
Fibroblast/Stromal Cells (Day 14)	Iigp1	ova high	1.08754	0.488309	207076	0.612397	1.34562e-10	7.74727e-09	56.2264	39.185
Fibroblast/Stromal Cells (Day 14)	C4b	ova high	1.95419	0.484609	212678	0.628964	2.5916e-11	1.7296e-09	85.283	72.8056
Fibroblast/Stromal Cells (Day 14)	Gsn	ova high	3.08431	0.480259	198824	0.587993	6.15235e-06	0.000139524	90.9434	84.0125
Fibroblast/Stromal Cells (Day 14)	Sod2	ova high	0.805352	0.475337	221610	0.655381	1.50032e-20	3.18594e-18	55.8491	31.6614
Fibroblast/Stromal Cells (Day 14)	Cav1	ova high	0.79923	0.460554	215108	0.636152	3.6153e-17	5.00964e-15	50.1887	28.3699
Fibroblast/Stromal Cells (Day 14)	Plpp3	ova high	1.74731	0.457978	208519	0.616665	1.44281e-09	6.9591e-08	82.2642	69.9843
Fibroblast/Stromal Cells (Day 14)	Hspa9	ova high	0.935825	0.449785	223220	0.660139	1.01243e-18	1.68921e-16	66.0377	45.0627
Fibroblast/Stromal Cells (Day 14)	Selenop	ova high	1.31093	0.449412	213233	0.630606	5.46758e-12	4.04526e-10	73.5849	59.4828
Fibroblast/Stromal Cells (Day 14)	Ubc	ova high	2.1767	0.448693	226090	0.668628	4.96291e-18	7.51375e-16	95.0943	89.185
Fibroblast/Stromal Cells (Day 14)	Ifi205	ova high	0.944545	0.444877	208806	0.617515	1.99724e-11	1.36313e-09	56.2264	39.4201
Fibroblast/Stromal Cells (Day 14)	Zfp36	ova high	1.79473	0.422203	207059	0.612347	6.27577e-09	2.7364e-07	84.1509	72.9624
Fibroblast/Stromal Cells (Day 14)	Angptl4	ova high	0.800271	0.418215	213746	0.632121	2.47549e-15	2.71655e-13	52.8302	32.0533
Fibroblast/Stromal Cells (Day 14)	Plin2	ova high	0.699102	0.415821	217104	0.642052	1.42323e-18	2.32713e-16	51.6981	27.9781
Fibroblast/Stromal Cells (Day 14)	Aplp2	ova high	1.39949	0.411252	212026	0.627038	4.25489e-11	2.74987e-09	75.4717	70.4545
Fibroblast/Stromal Cells (Day 14)	H2-T23	ova high	1.13111	0.399792	204828	0.605751	1.91956e-08	7.54488e-07	69.0566	57.1317
Fibroblast/Stromal Cells (Day 14)	Bst2	ova high	1.43571	0.39814	205226	0.606928	2.74392e-08	1.04582e-06	79.6226	68.5737
Fibroblast/Stromal Cells (Day 14)	Trib1	ova high	0.723646	0.382885	214717	0.634994	1.41579e-16	1.76714e-14	52.0755	29.3103
Fibroblast/Stromal Cells (Day 14)	AW112010	ova high	1.0168	0.377968	199019	0.58857	1.08424e-06	2.97957e-05	56.2264	47.6489
Fibroblast/Stromal Cells (Day 14)	Ctsb	ova high	1.65195	0.377308	218058	0.644876	8.9461e-14	8.26427e-12	88.6792	79.9373
Fibroblast/Stromal Cells (Day 14)	Scp2	ova high	0.866592	0.374132	204686	0.605328	5.04117e-09	2.246e-07	57.7358	45.2194
Fibroblast/Stromal Cells (Day 14)	Cebpb	ova high	1.11325	0.373906	209507	0.619587	1.81713e-10	1.03166e-08	70.566	55.3292
Fibroblast/Stromal Cells (Day 14)	Slc1a5	ova high	0.862155	0.367857	211008	0.624024	6.68468e-12	4.79391e-10	62.6415	44.906
Fibroblast/Stromal Cells (Day 14)	Ywhag	ova high	1.09578	0.36354	215702	0.637909	3.27202e-13	2.89194e-11	75.0943	58.8558
Fibroblast/Stromal Cells (Day 14)	Cyb5a	ova high	1.42457	0.359183	216122	0.639149	6.52151e-13	5.55381e-11	80.7547	74.7649
Fibroblast/Stromal Cells (Day 14)	Txnip	ova high	0.977028	0.353978	208439	0.616428	2.449e-10	1.33479e-08	66.7925	49.0596
Fibroblast/Stromal Cells (Day 14)	Sod1	ova high	0.907958	0.344101	209585	0.619817	7.21735e-11	4.50423e-09	64.5283	49.4514
Fibroblast/Stromal Cells (Day 14)	Arl4a	ova high	0.651821	0.336553	214360	0.633937	5.88358e-16	6.76077e-14	53.2075	30.7994
Fibroblast/Stromal Cells (Day 14)	Sqstm1	ova high	0.904885	0.33366	206644	0.61112	1.20591e-09	5.95703e-08	63.0189	47.9624
Fibroblast/Stromal Cells (Day 14)	Junb	ova high	2.3068	0.324463	196096	0.579925	4.03193e-05	0.000729271	92.0755	84.6395
Fibroblast/Stromal Cells (Day 14)	G3bp2	ova high	0.87209	0.323403	211916	0.626711	5.7465e-12	4.2135e-10	67.9245	48.9812
Fibroblast/Stromal Cells (Day 14)	Tapbp	ova high	1.00334	0.320421	207340	0.613178	1.81266e-09	8.66634e-08	70.566	56.8182
Fibroblast/Stromal Cells (Day 14)	Psap	ova high	1.85479	0.3203	213405	0.631114	1.67592e-11	1.15624e-09	93.2075	86.7555
Fibroblast/Stromal Cells (Day 14)	St13	ova high	1.08752	0.315791	212860	0.629503	1.05658e-11	7.44663e-10	77.7358	61.5987
Fibroblast/Stromal Cells (Day 14)	Lpl	ova high	1.64674	0.311001	192659	0.569761	0.000291226	0.00407692	75.8491	69.9843
Fibroblast/Stromal Cells (Day 14)	Gstm1	ova high	0.685081	0.310162	207992	0.615106	2.08489e-12	1.65486e-10	51.3208	29.7806
Fibroblast/Stromal Cells (Day 14)	mt-Co1	ova high	4.16301	0.302584	223903	0.662161	8.91813e-17	1.16656e-14	100	99.6082
Fibroblast/Stromal Cells (Day 14)	Tgoln1	ova high	1.00576	0.301242	209241	0.6188	3.31489e-10	1.77711e-08	72.0755	58.6991
Fibroblast/Stromal Cells (Day 14)	Nampt	ova high	0.632873	0.290375	208146	0.615563	4.19211e-12	3.14427e-10	52.0755	32.0533
Fibroblast/Stromal Cells (Day 14)	Pnp	ova high	0.992374	0.290004	202993	0.600322	8.60605e-08	2.9813e-06	69.0566	55.2508
Fibroblast/Stromal Cells (Day 14)	H2-K1	ova high	3.21899	0.288964	210324	0.622001	3.89174e-10	2.07276e-08	99.2453	97.9624
Fibroblast/Stromal Cells (Day 14)	Chchd2	ova high	2.21073	0.287936	201284	0.595267	1.01893e-06	2.82863e-05	96.6038	91.5361
Fibroblast/Stromal Cells (Day 14)	Grina	ova high	0.6619	0.286548	204216	0.603941	1.08656e-09	5.41655e-08	51.3208	35.5799
Fibroblast/Stromal Cells (Day 14)	Vegfa	ova high	0.947844	0.284301	198689	0.587594	1.90138e-06	4.94269e-05	60.7547	50.2351
Fibroblast/Stromal Cells (Day 14)	Npc2	ova high	1.80299	0.278984	195460	0.578046	6.10102e-05	0.00104349	91.6981	84.953
Fibroblast/Stromal Cells (Day 14)	Ctsd	ova high	1.28591	0.278047	203910	0.603036	9.16517e-08	3.14831e-06	79.6226	70.768
Fibroblast/Stromal Cells (Day 14)	Degs1	ova high	0.885444	0.277222	206562	0.610879	2.59634e-09	1.20604e-07	69.434	52.6646
Fibroblast/Stromal Cells (Day 14)	Socs3	ova high	0.735692	0.2749	200964	0.594323	2.58044e-08	9.87597e-07	51.6981	34.4828
Fibroblast/Stromal Cells (Day 14)	Pim1	ova high	0.799436	0.269754	201720	0.596559	3.90612e-08	1.46153e-06	58.1132	39.5768
Fibroblast/Stromal Cells (Day 14)	Atp5g3	ova high	1.25306	0.267279	206809	0.611608	7.5145e-09	3.23341e-07	80	72.1787
Fibroblast/Stromal Cells (Day 14)	Prdx6	ova high	0.705239	0.266679	203934	0.603105	5.41419e-09	2.39912e-07	57.3585	40.9091
Fibroblast/Stromal Cells (Day 14)	Hspa8	ova high	2.36331	0.264049	207189	0.612731	7.31252e-09	3.16315e-07	95.4717	93.0251
Fibroblast/Stromal Cells (Day 14)	Ifrd1	ova high	1.52151	0.262889	196532	0.581213	2.66732e-05	0.00050537	81.1321	73.3542
Fibroblast/Stromal Cells (Day 14)	Grn	ova high	1.0738	0.26187	200530	0.593038	1.04477e-06	2.88079e-05	71.6981	63.0094
Fibroblast/Stromal Cells (Day 14)	Rnf213	ova high	0.671443	0.259612	203834	0.602811	2.06307e-09	9.80617e-08	53.5849	36.1285
Fibroblast/Stromal Cells (Day 14)	Zbtb20	ova high	1.91682	0.254215	200863	0.594023	1.3823e-06	3.73588e-05	90.9434	87.069
Fibroblast/Stromal Cells (Day 14)	Uqcr11	ova high	1.35011	0.254071	204108	0.60362	9.09733e-08	3.13159e-06	81.8868	77.1944
Fibroblast/Stromal Cells (Day 14)	Psme1	ova high	0.972772	0.251513	200362	0.592542	1.02428e-06	2.83675e-05	69.8113	59.953
Fibroblast/Stromal Cells (Day 14)	Rnf19b	ova high	0.711192	0.251464	196384	0.580777	3.2251e-06	7.90608e-05	50.566	38.7147
Fibroblast/Stromal Cells (Day 14)	Etfa	ova high	0.644439	0.250493	204212	0.603926	2.30244e-09	1.07871e-07	54.3396	38.4013
Fibroblast/Stromal Cells (Day 14)	Crip1	ova low	3.08994	0.867783	233141	0.689481	2.40025e-22	6.76664e-20	93.7304	78.4906
Fibroblast/Stromal Cells (Day 14)	Emp3	ova low	2.16709	0.784032	235213	0.695608	8.96068e-24	2.99012e-21	88.4796	66.0377
Fibroblast/Stromal Cells (Day 14)	Bgn	ova low	2.73967	0.742156	231484	0.68458	2.5833e-21	6.03422e-19	88.7147	80
Fibroblast/Stromal Cells (Day 14)	Des	ova low	1.33719	0.714511	232316	0.687041	8.07435e-23	2.49101e-20	69.2006	36.9811
Fibroblast/Stromal Cells (Day 14)	Col3a1	ova low	3.6941	0.670021	204528	0.604862	7.36691e-08	2.5849e-06	90.8307	84.5283
Fibroblast/Stromal Cells (Day 14)	Col1a1	ova low	3.04973	0.669935	211592	0.625754	1.06409e-10	6.35e-09	89.4201	76.6038
Fibroblast/Stromal Cells (Day 14)	Col1a2	ova low	3.28365	0.640587	202530	0.598955	3.75817e-07	1.14007e-05	90.047	76.2264
Fibroblast/Stromal Cells (Day 14)	Fn1	ova low	3.15893	0.615276	202977	0.600275	2.56602e-07	7.96147e-06	86.442	76.9811
Fibroblast/Stromal Cells (Day 14)	Fbn1	ova low	2.66596	0.601892	210582	0.622766	2.585e-10	1.39958e-08	81.7398	73.2075
Fibroblast/Stromal Cells (Day 14)	Postn	ova low	2.02479	0.561124	207842	0.614664	2.91996e-09	1.34113e-07	76.6458	59.6226
Fibroblast/Stromal Cells (Day 14)	Tmsb4x	ova low	3.74994	0.554351	216288	0.639639	7.88448e-13	6.51107e-11	98.0408	92.4528
Fibroblast/Stromal Cells (Day 14)	Fstl1	ova low	3.04254	0.544444	208072	0.615344	3.17533e-09	1.45027e-07	88.8715	82.2642
Fibroblast/Stromal Cells (Day 14)	Igfbp7	ova low	2.26499	0.535488	225399	0.666585	1.18626e-17	1.74744e-15	87.6959	84.9057
Fibroblast/Stromal Cells (Day 14)	Col14a1	ova low	1.83783	0.530475	212740	0.629149	2.38666e-11	1.60594e-09	77.2727	61.5094
Fibroblast/Stromal Cells (Day 14)	Rbp1	ova low	0.831851	0.528021	222994	0.659471	8.46944e-19	1.45772e-16	52.1944	23.7736
Fibroblast/Stromal Cells (Day 14)	Itgb1	ova low	2.13684	0.52252	234261	0.692793	4.37326e-23	1.37514e-20	90.5172	86.0377
Fibroblast/Stromal Cells (Day 14)	Mfap5	ova low	2.13066	0.521471	205193	0.606829	2.58511e-08	9.87597e-07	70.0627	61.1321
Fibroblast/Stromal Cells (Day 14)	S100a6	ova low	3.81007	0.502623	206364	0.610292	1.51034e-08	6.09768e-07	90.9091	86.0377
Fibroblast/Stromal Cells (Day 14)	Col6a1	ova low	1.82002	0.492353	214634	0.634749	4.1447e-12	3.12304e-10	85.0313	67.9245
Fibroblast/Stromal Cells (Day 14)	Cd9	ova low	1.58744	0.490939	216708	0.640881	3.66717e-13	3.22376e-11	80.7994	62.6415
Fibroblast/Stromal Cells (Day 14)	Dcn	ova low	3.13939	0.472359	195402	0.577875	6.28379e-05	0.00107139	86.2069	77.3585
Fibroblast/Stromal Cells (Day 14)	S100a4	ova low	1.08393	0.464738	209154	0.618544	1.44593e-10	8.29558e-09	56.9749	36.9811
Fibroblast/Stromal Cells (Day 14)	Cd44	ova low	1.82699	0.434554	202114	0.597723	4.51265e-07	1.35551e-05	78.9185	64.5283
Fibroblast/Stromal Cells (Day 14)	Ltbp4	ova low	1.00529	0.415188	210746	0.623252	5.44171e-11	3.43542e-09	61.9906	42.6415
Fibroblast/Stromal Cells (Day 14)	Emp1	ova low	1.9753	0.407335	208304	0.616029	2.14413e-09	1.01033e-07	77.8997	75.0943
Fibroblast/Stromal Cells (Day 14)	Dclk1	ova low	1.6745	0.395822	212025	0.627033	5.95091e-11	3.7281e-09	81.2696	70.566
Fibroblast/Stromal Cells (Day 14)	Tpm1	ova low	1.35082	0.394908	212450	0.62829	3.28436e-11	2.1481e-09	77.3511	63.3962
Fibroblast/Stromal Cells (Day 14)	Col6a2	ova low	1.66899	0.393439	204220	0.603953	8.57998e-08	2.97858e-06	82.4451	67.1698
Fibroblast/Stromal Cells (Day 14)	Sh3bgrl3	ova low	1.44218	0.379566	210495	0.622508	2.42662e-10	1.32701e-08	77.2727	66.4151
Fibroblast/Stromal Cells (Day 14)	Cdh11	ova low	0.81903	0.378286	213998	0.63287	6.6856e-13	5.63485e-11	57.4451	34.717
Fibroblast/Stromal Cells (Day 14)	Sparc	ova low	3.46139	0.377635	216542	0.64039	5.89285e-13	5.04472e-11	92.2414	95.4717
Fibroblast/Stromal Cells (Day 14)	Heg1	ova low	1.41798	0.369679	206698	0.611279	7.71784e-09	3.31219e-07	73.4326	63.0189
Fibroblast/Stromal Cells (Day 14)	Sulf1	ova low	1.03226	0.368072	208924	0.617861	5.11145e-10	2.68737e-08	65.7524	45.283
Fibroblast/Stromal Cells (Day 14)	Sdc2	ova low	1.31329	0.352959	207224	0.612836	4.85467e-09	2.16882e-07	74.0596	62.6415
Fibroblast/Stromal Cells (Day 14)	Cd34	ova low	1.82082	0.35242	194724	0.575869	8.0031e-05	0.00133122	71.8652	62.2642
Fibroblast/Stromal Cells (Day 14)	Fbln2	ova low	1.27469	0.343195	200551	0.5931	1.00135e-06	2.79882e-05	65.9091	54.717
Fibroblast/Stromal Cells (Day 14)	Cald1	ova low	2.17644	0.337849	205222	0.606913	4.05311e-08	1.50962e-06	89.3417	84.1509
Fibroblast/Stromal Cells (Day 14)	Timp2	ova low	2.07141	0.333972	195393	0.577846	6.16629e-05	0.00105355	83.0721	72.8302
Fibroblast/Stromal Cells (Day 14)	Itih5	ova low	1.38081	0.331695	201995	0.597371	4.67791e-07	1.39578e-05	76.4107	62.6415
Fibroblast/Stromal Cells (Day 14)	Ppib	ova low	1.73798	0.330864	217110	0.642071	3.04859e-13	2.72391e-11	90.1254	85.6604
Fibroblast/Stromal Cells (Day 14)	Cygb	ova low	0.82329	0.328468	203986	0.603259	1.89574e-08	7.4692e-07	54.7806	37.3585
Fibroblast/Stromal Cells (Day 14)	Filip1l	ova low	0.835858	0.327518	209802	0.620458	1.11018e-10	6.577e-09	60.1097	38.8679
Fibroblast/Stromal Cells (Day 14)	Selenof	ova low	1.27433	0.322176	214167	0.633368	6.50873e-12	4.6883e-10	82.1317	70.9434
Fibroblast/Stromal Cells (Day 14)	Col5a2	ova low	1.63537	0.320868	201999	0.597383	5.21711e-07	1.5398e-05	80.7994	71.3208
Fibroblast/Stromal Cells (Day 14)	Cd248	ova low	1.50548	0.320295	196618	0.581468	2.28571e-05	0.000441246	72.5705	59.2453
Fibroblast/Stromal Cells (Day 14)	Clic1	ova low	1.00158	0.316425	207243	0.612891	3.47158e-09	1.58116e-07	69.2006	50.9434
Fibroblast/Stromal Cells (Day 14)	Plod2	ova low	1.26835	0.305139	197765	0.584861	9.17763e-06	0.000202242	67.8683	61.1321
Fibroblast/Stromal Cells (Day 14)	Plxdc2	ova low	0.752882	0.29419	204310	0.604217	1.6993e-08	6.74398e-07	56.2696	39.2453
Fibroblast/Stromal Cells (Day 14)	Ssr4	ova low	1.31571	0.293178	197382	0.58373	1.5692e-05	0.000320324	79.3887	70.1887
Fibroblast/Stromal Cells (Day 14)	Lhfp	ova low	0.945391	0.291087	204268	0.604094	4.52608e-08	1.67814e-06	66.8495	50.1887
Fibroblast/Stromal Cells (Day 14)	Dpysl3	ova low	1.02702	0.289795	203425	0.6016	1.04939e-07	3.53785e-06	68.5737	53.2075
Fibroblast/Stromal Cells (Day 14)	Scara3	ova low	0.914419	0.289723	201651	0.596354	2.71638e-07	8.39614e-06	60.8934	41.8868
Fibroblast/Stromal Cells (Day 14)	Col5a1	ova low	1.472	0.289109	196906	0.582321	2.14452e-05	0.000418438	79.1536	65.6604
Fibroblast/Stromal Cells (Day 14)	Ppic	ova low	1.04816	0.289061	203553	0.601978	9.9591e-08	3.38547e-06	69.5925	54.717
Fibroblast/Stromal Cells (Day 14)	Dynll1	ova low	1.66272	0.28754	200603	0.593254	1.6731e-06	4.39115e-05	88.4796	77.7358
Fibroblast/Stromal Cells (Day 14)	Vcan	ova low	1.40608	0.285656	196802	0.582015	1.90319e-05	0.0003772	69.9843	60
Fibroblast/Stromal Cells (Day 14)	Selenom	ova low	1.08284	0.285038	203206	0.600952	1.49953e-07	4.83606e-06	72.2571	56.9811
Fibroblast/Stromal Cells (Day 14)	Actn1	ova low	0.894392	0.282352	202901	0.60005	1.13003e-07	3.78629e-06	62.7743	46.7925
Fibroblast/Stromal Cells (Day 14)	Loxl2	ova low	1.04571	0.281533	198816	0.587968	3.54435e-06	8.58573e-05	64.7335	51.6981
Fibroblast/Stromal Cells (Day 14)	Enpp2	ova low	0.92675	0.273868	187430	0.554296	0.00294178	0.0272065	51.4107	44.9057
Fibroblast/Stromal Cells (Day 14)	Pmp22	ova low	0.917454	0.272532	203180	0.600874	1.0389e-07	3.51698e-06	64.4984	51.3208
Fibroblast/Stromal Cells (Day 14)	Itgav	ova low	0.975898	0.269673	203535	0.601925	9.72016e-08	3.32498e-06	68.652	54.717
Fibroblast/Stromal Cells (Day 14)	Pam	ova low	1.30003	0.267418	203220	0.600992	1.86819e-07	5.95453e-06	78.2915	71.3208
Fibroblast/Stromal Cells (Day 14)	Malat1	ova low	5.38214	0.264055	198639	0.587446	7.26771e-06	0.000163458	99.2163	98.4906
Fibroblast/Stromal Cells (Day 14)	Rrbp1	ova low	1.92464	0.264053	207894	0.614816	3.83002e-09	1.7252e-07	92.2414	89.434
Fibroblast/Stromal Cells (Day 14)	Atpif1	ova low	1.38865	0.262122	205943	0.609047	2.01415e-08	7.87878e-07	82.7586	76.9811
Fibroblast/Stromal Cells (Day 14)	Hmgb1	ova low	1.93218	0.25933	206130	0.609598	1.8716e-08	7.39193e-07	92.4765	89.8113
Fibroblast/Stromal Cells (Day 14)	Txndc5	ova low	0.972402	0.257983	202064	0.597575	3.60385e-07	1.10143e-05	70.8464	54.717
Fibroblast/Stromal Cells (Day 14)	Tmed10	ova low	1.43833	0.257265	205768	0.608529	2.41935e-08	9.28611e-07	84.8746	78.8679
Fibroblast/Stromal Cells (Day 14)	Lgals1	ova low	2.78837	0.255743	202339	0.598388	4.46406e-07	1.34423e-05	92.3197	93.9623
Fibroblast/Stromal Cells (Day 14)	Prrx1	ova low	1.67424	0.252264	195827	0.57913	4.65843e-05	0.00082257	82.6803	75.4717
